# Supplementary material for: The prevalence of comorbid serious mental illnesses and substance use disorders in prison populations: a systematic review and meta-analysis
Source: PubMed Central journal article supplement (PMC9178214; doi:10.1016/s2468-2667(22)00093-7), 2022-06-01
Supplement: mmc1.pdf [file mmc1.pdf]

# THE LANCET

## Public Health

### **Supplementary appendix**

This appendix formed part of the original submission and has been peer reviewed. We post it as supplied by the authors.

Supplement to: Baranyi G, Fazel S, Delhey Langerfeldt S, Mundt AP. The prevalence of comorbid serious mental illnesses and substance use disorders in prison populations: a systematic review and meta-analysis. *Lancet Public Health* 2022; **7**: 557–68.

## Web Appendix

|                                                                                                                                                                                                     | <b>Page</b> |
|-----------------------------------------------------------------------------------------------------------------------------------------------------------------------------------------------------|-------------|
| Supplementary Material 1: General search terms .....                                                                                                                                                | 2           |
| Supplementary Table 1: Search terms executed in databases .....                                                                                                                                     | 3-5         |
| Supplementary Material 2: Critical Appraisal Tool .....                                                                                                                                             | 6           |
| Supplementary Table 2: Characteristics of included samples .....                                                                                                                                    | 7-8         |
| Supplementary Table 3: Race/ethnicity, nationality and country of birth in the included studies .....                                                                                               | 9-10        |
| Supplementary Table 4: Quality appraisal of included samples .....                                                                                                                                  | 11          |
| Supplementary Table 5: Prevalence estimates and odds ratios of co-occurring mental and substance use disorders in prison populations .....                                                          | 12          |
| Supplementary Table 6: Meta-regression exploring heterogeneity across estimates of comorbid non-affective psychosis and substance use disorders .....                                               | 13          |
| Supplementary Table 7: Meta-regression exploring heterogeneity across estimates of comorbid depression and substance use disorders .....                                                            | 14          |
| Supplementary Table 8: Meta-regression exploring heterogeneity across estimates of comorbid Axis I and substance use disorders .....                                                                | 15          |
| Supplementary Table 9: Prevalence estimates and odds ratios of comorbid mental and substance use disorders applying narrow disorder criteria for non-affective psychosis and major depression ..... | 16          |
| Supplementary Table 10: Egger's test indicating funnel plot asymmetry .....                                                                                                                         | 17          |
| Supplementary Figure 1: Funnel plots for co-occurring substance use disorders and (1) non-affective psychosis, (2) depression and (3) Axis I disorders .....                                        | 18-20       |
| Supplementary Table 11: Meta-regression with quality appraisal score .....                                                                                                                          | 21          |
| Supplementary Table 12: Prevalence of comorbid mental and substance use disorders before and after exclusion of outlier estimates .....                                                             | 22          |
| References .....                                                                                                                                                                                    | 23-26       |

## **Supplementary Material 1: General search terms**

### *Mental disorders*

Mental Disorders (Subject Heading) OR Substance-Related Disorders (Subject Heading) OR psychiatr\* OR psycho\* OR depress\* OR schizophren\* OR alcohol\* OR substance OR addict\* OR "dual disorder" OR "dual disorders"

### *Prison setting*

prison\* OR inmate\* OR imprison\* OR correctional\* OR jail\* OR "criminal justice" OR detain\* OR sentenced OR remand OR incarcerate\*

### *Epidemiological studies*

Epidemiology (Subject Heading) OR comorbid\* OR prevalence OR incidence

*Limit:* 1980 to Present

**Supplementary Table 1: Search terms executed in databases**

| <b>Prison</b>                                                                                                                                                                                                                                                                                                                                     | <b>Epidemiology</b>                                                                                                                                                                                                                                                           | <b>Mental health</b>                                                                                                                                                                                                                                                                                                                                                                                                                                                     |
|---------------------------------------------------------------------------------------------------------------------------------------------------------------------------------------------------------------------------------------------------------------------------------------------------------------------------------------------------|-------------------------------------------------------------------------------------------------------------------------------------------------------------------------------------------------------------------------------------------------------------------------------|--------------------------------------------------------------------------------------------------------------------------------------------------------------------------------------------------------------------------------------------------------------------------------------------------------------------------------------------------------------------------------------------------------------------------------------------------------------------------|
| <b>Applied Social Sciences Index and Abstracts (ASSIA) (25/09/2021) (1006)*</b>                                                                                                                                                                                                                                                                   |                                                                                                                                                                                                                                                                               |                                                                                                                                                                                                                                                                                                                                                                                                                                                                          |
| ab,ti,su(prison* or inmate* or imprison* or correctional* or jail* or "criminal justice" or detain* or sentenced or remand or incarcerate*) 30530                                                                                                                                                                                                 | Exact("epidemiology") OR ab,ti,su(comorbid* OR prevalence OR incidence) 78171                                                                                                                                                                                                 | Exact("substance-related disorders" OR "substance abuse disorders" OR "mental disorders") or ab,ti,su(psychiatr* or psycho* or depress* or schizophren* or alcohol* or substance or addict* or "dual disorder" or "dual disorders") 293200                                                                                                                                                                                                                               |
| <b>CAB Abstracts (25/09/2021) (185)*</b>                                                                                                                                                                                                                                                                                                          |                                                                                                                                                                                                                                                                               |                                                                                                                                                                                                                                                                                                                                                                                                                                                                          |
| (prison* or inmate* or imprison* or correctional* or jail* or "criminal justice" or detain* or sentenced or remand or incarcerate*).mp. [mp=abstract, title, original title, broad terms, heading words, identifiers, cabicodes] 2969                                                                                                             | epidemiology/ or comorbid*.mp. or prevalence.mp. or incidence.mp. [mp=abstract, title, original title, broad terms, heading words, identifiers, cabicodes] 559202                                                                                                             | mental disorders/ or substance abuse/ or psychiatr*.mp. or psycho*.mp. or depress*.mp. or schizophren*.mp. or alcohol*.mp. or substance.mp. or addict*.mp. or "dual disorder".mp. or "dual disorders".mp. [mp=abstract, title, original title, broad terms, heading words, identifiers, cabicodes] 358832                                                                                                                                                                |
| <b>Criminal Justice Database (25/09/2021) (894)*</b>                                                                                                                                                                                                                                                                                              |                                                                                                                                                                                                                                                                               |                                                                                                                                                                                                                                                                                                                                                                                                                                                                          |
| ab,ti,su(prison* or inmate* or imprison* or correctional* or jail* or "criminal justice" or detain* or sentenced or remand or incarcerate*) 160615                                                                                                                                                                                                | Exact("epidemiology") OR ab,ti,su(comorbid* OR prevalence OR incidence) 21219                                                                                                                                                                                                 | Exact("substance-related disorders" OR "substance abuse" OR "mental disorders") OR ab,ti,su(psychiatr* OR psycho* OR depress* OR schizophren* OR alcohol* OR substance OR addict* OR "dual disorder" OR "dual disorders") 123384                                                                                                                                                                                                                                         |
| <b>Embase (25/09/2021) (4797)*</b>                                                                                                                                                                                                                                                                                                                |                                                                                                                                                                                                                                                                               |                                                                                                                                                                                                                                                                                                                                                                                                                                                                          |
| (prison* or inmate* or imprison* or correctional* or jail* or "criminal justice" or detain* or sentenced or remand or incarcerate*).mp. [mp=title, abstract, heading word, drug trade name, original title, device manufacturer, drug manufacturer, device trade name, keyword heading word, floating subheading word, candidate term word] 52798 | epidemiology/ or comorbid*.mp. or prevalence.mp. or incidence.mp. [mp=title, abstract, heading word, drug trade name, original title, device manufacturer, drug manufacturer, device trade name, keyword heading word, floating subheading word, candidate term word] 2802900 | mental disease/ or substance abuse/ or drug dependence/ or drug abuse/ or alcohol abuse/ or psychiatr*.mp. or psycho*.mp. or depress*.mp. or schizophren*.mp. or alcohol*.mp. or substance.mp. or addict*.mp. or "dual disorder".mp. or "dual disorders".mp. [mp=title, abstract, heading word, drug trade name, original title, device manufacturer, drug manufacturer, device trade name, keyword heading word, floating subheading word, candidate term word] 3308760 |
| <b>Global Health (25/09/2021) (813)*</b>                                                                                                                                                                                                                                                                                                          |                                                                                                                                                                                                                                                                               |                                                                                                                                                                                                                                                                                                                                                                                                                                                                          |
| (prison* or inmate* or imprison* or correctional* or jail* or "criminal justice" or detain* or sentenced or remand or incarcerate*).mp. [mp=abstract, title, original title, broad terms, heading words, identifiers, cabicodes] 7057                                                                                                             | epidemiology/ or comorbid*.mp. or prevalence.mp. or incidence.mp. [mp=abstract, title, original title, broad terms, heading words, identifiers, cabicodes] 637009                                                                                                             | mental disorders/ or substance abuse/ or psychiatr*.mp. or psycho*.mp. or depress*.mp. or schizophren*.mp. or alcohol*.mp. or substance.mp. or addict*.mp. or "dual disorder".mp. or "dual disorders".mp. [mp=abstract, title, original title, broad terms, heading words, identifiers, cabicodes] 300699                                                                                                                                                                |
| <b>International Bibliography of the Social Sciences (IBSS) (25/09/2021) (296)*</b>                                                                                                                                                                                                                                                               |                                                                                                                                                                                                                                                                               |                                                                                                                                                                                                                                                                                                                                                                                                                                                                          |
| ab,ti,su(prison* or inmate* or imprison* or correctional* or jail* or "criminal justice" or detain* or sentenced or remand or incarcerate*) 50713                                                                                                                                                                                                 | Exact("epidemiology") OR ab,ti,su(comorbid* OR prevalence OR incidence) 41675                                                                                                                                                                                                 | Exact("substance-related disorders" OR "substance abuse" OR "mental disorders") or ab,ti,su(psychiatr* or psycho* or depress* or schizophren* or alcohol* or substance or addict* or "dual disorder" or "dual disorders") 206476                                                                                                                                                                                                                                         |
| <b>Global Index Medicus (GIM) (25/09/2021) (277)*</b>                                                                                                                                                                                                                                                                                             |                                                                                                                                                                                                                                                                               |                                                                                                                                                                                                                                                                                                                                                                                                                                                                          |
| tw:(prison* or inmate* or imprison* or correctional* or jail* or "criminal justice" or detain* or sentenced or remand or incarcerate*) 3825                                                                                                                                                                                                       | tw:(epidemiolog* OR comorbid* OR prevalence OR incidence) 320363                                                                                                                                                                                                              | tw:("mental illness" or "mental disorder" OR "mental disorders" OR "drug use disorder" OR psychiatr* or psycho* or depress* or schizophren* or alcohol* or substance or addict* or "dual disorder" or "dual disorders") 209699                                                                                                                                                                                                                                           |
| <b>Ovid MEDLINE(R) and Epub Ahead of Print, In-Process, In-Data-Review &amp; Other Non-Indexed Citations, Daily and Versions(R) (25/09/2021) (3727)*</b>                                                                                                                                                                                          |                                                                                                                                                                                                                                                                               |                                                                                                                                                                                                                                                                                                                                                                                                                                                                          |
| (prison* or inmate* or imprison* or correctional* or jail* or "criminal justice" or detain* or sentenced or remand or incarcerate*).mp. [mp=title, abstract, original title, name of substance word, subject heading word, floating                                                                                                               | Epidemiology/ or comorbid*.mp. or prevalence.mp. or incidence.mp. [mp=title, abstract, original title, name of substance word, subject heading word, floating sub-heading word, keyword heading word, organism supplementary                                                  | Mental Disorders/ or Substance-Related Disorders/ or psychiatr*.mp. or psycho*.mp. or depress*.mp. or schizophren*.mp. or alcohol*.mp. or substance.mp. or addict*.mp. or "dual disorder".mp. or "dual disorders".mp. [mp=title, abstract, original                                                                                                                                                                                                                      |

|                                                                                                                                                                                                                                                           |                                                                                                                                                                                          |                                                                                                                                                                                                                                                                                                                                                |
|-----------------------------------------------------------------------------------------------------------------------------------------------------------------------------------------------------------------------------------------------------------|------------------------------------------------------------------------------------------------------------------------------------------------------------------------------------------|------------------------------------------------------------------------------------------------------------------------------------------------------------------------------------------------------------------------------------------------------------------------------------------------------------------------------------------------|
| sub-heading word, keyword heading word, organism supplementary concept word, protocol supplementary concept word, rare disease supplementary concept word, unique identifier, synonyms] 44424                                                             | concept word, protocol supplementary concept word, rare disease supplementary concept word, unique identifier, synonyms] 1805551                                                         | title, name of substance word, subject heading word, floating sub-heading word, keyword heading word, organism supplementary concept word, protocol supplementary concept word, rare disease supplementary concept word, unique identifier, synonyms] 3017644                                                                                  |
| <b>National Criminal Justice Reference Service (NCJRS) Abstracts Database (25/09/2021) (597)*</b>                                                                                                                                                         |                                                                                                                                                                                          |                                                                                                                                                                                                                                                                                                                                                |
| ab,ti,su(prison* or inmate* or imprison* or correctional* or jail* or "criminal justice" or detain* or sentenced or remand or incarcerate*) 74727                                                                                                         | ab,ti,su(comorbid* OR prevalence OR incidence OR epidemiology) 9818                                                                                                                      | Exact("substance abuse (60399)" OR "mental disorders (04529)") OR ab,ti,su(psychiatr* OR psycho* OR depress* OR schizophren* OR alcohol* OR substance OR addict* OR "dual disorder" OR "dual disorders") 34647                                                                                                                                 |
| <b>PAIS Index (25/09/2021) (231)*</b>                                                                                                                                                                                                                     |                                                                                                                                                                                          |                                                                                                                                                                                                                                                                                                                                                |
| ab,ti,su(prison* or inmate* or imprison* or correctional* or jail* or "criminal justice" or detain* or sentenced or remand or incarcerate*) 21432                                                                                                         | Exact("epidemiology") or ab,ti,su(comorbid* OR prevalence OR incidence) 22449                                                                                                            | Exact("substance-related disorders" OR "mental disorders") or ab,ti,su(psychiatr* or psycho* or depress* or schizophren* or alcohol* or substance or addict* or "dual disorder" or "dual disorders") 40755                                                                                                                                     |
| <b>APA PsycInfo (25/09/2021) (3536)*</b>                                                                                                                                                                                                                  |                                                                                                                                                                                          |                                                                                                                                                                                                                                                                                                                                                |
| (prison* or inmate* or imprison* or correctional* or jail* or "criminal justice" or detain* or sentenced or remand or incarcerate*).mp. [mp=title, abstract, heading word, table of contents, key concepts, original title, tests & measures, mesh] 57499 | exp Epidemiology/ or comorbid*.mp. or prevalence.mp. or incidence.mp. [mp=title, abstract, heading word, table of contents, key concepts, original title, tests & measures, mesh] 272908 | exp "Substance Use Disorder"/ or exp Mental Disorders/ or psychiatr*.mp. or psycho*.mp. or depress*.mp. or schizophren*.mp. or alcohol*.mp. or substance.mp. or addict*.mp. or "dual disorder".mp. or "dual disorders".mp. [mp=title, abstract, heading word, table of contents, key concepts, original title, tests & measures, mesh] 2235079 |
| <b>Russian Science Citation Index (25/09/2021) (37)*</b>                                                                                                                                                                                                  |                                                                                                                                                                                          |                                                                                                                                                                                                                                                                                                                                                |
| TS=(prison* or inmate* or imprison* or correctional* or jail* or "criminal justice" or detain* or sentenced or remand or incarcerate*) 2980                                                                                                               | TS=(epidemiolog* OR comorbid* OR prevalence OR incidence) 29745                                                                                                                          | TS=("mental illness" or "mental disorder" OR "mental disorders" OR "drug use disorder" OR psychiatr* or psycho* or depress* or schizophren* or alcohol* or substance or addict* or "dual disorder" or "dual disorders") 50269                                                                                                                  |
| <b>Scielo (25/09/2021) (137)*</b>                                                                                                                                                                                                                         |                                                                                                                                                                                          |                                                                                                                                                                                                                                                                                                                                                |
| TS=(prison* or inmate* or imprison* or correctional* or jail* or "criminal justice" or detain* or sentenced or remand or incarcerate*) 4382                                                                                                               | TS=(epidemiolog* OR comorbid* OR prevalence OR incidence) 65513                                                                                                                          | TS=("mental illness" or "mental disorder" OR "mental disorders" OR "drug use disorder" OR psychiatr* or psycho* or depress* or schizophren* or alcohol* or substance or addict* or "dual disorder" or "dual disorders") 59441                                                                                                                  |
| <b>Social Services Abstracts (25/09/2021) (343)*</b>                                                                                                                                                                                                      |                                                                                                                                                                                          |                                                                                                                                                                                                                                                                                                                                                |
| ab,ti,su(prison* or inmate* or imprison* or correctional* or jail* or "criminal justice" or detain* or sentenced or remand or incarcerate*) 11736                                                                                                         | Exact("epidemiology") OR ab,ti,su(comorbid* OR prevalence OR incidence) 20114                                                                                                            | Exact("mental illness" OR "substance-related disorders" OR "substance abuse disorders" OR "mental disorders") or ab,ti,su(psychiatr* or psycho* or depress* or schizophren* or alcohol* or substance or addict* or "dual disorder" or "dual disorders") 76816                                                                                  |
| <b>Web of Science Core Collection (25/09/2021) (4198)*</b>                                                                                                                                                                                                |                                                                                                                                                                                          |                                                                                                                                                                                                                                                                                                                                                |
| TS=(prison* or inmate* or imprison* or correctional* or jail* or "criminal justice" or detain* or sentenced or remand or incarcerate*) 164807                                                                                                             | TS=(epidemiolog* OR comorbid* OR prevalence OR incidence) 2270730                                                                                                                        | TS=("mental illness" or "mental disorder" OR "mental disorders" OR "drug use disorder" OR psychiatr* or psycho* or depress* or schizophren* or alcohol* or substance or addict* or "dual disorder" or "dual disorders") 3014513                                                                                                                |
| <b>Grey literature</b>                                                                                                                                                                                                                                    |                                                                                                                                                                                          |                                                                                                                                                                                                                                                                                                                                                |
| <b>Open Grey (01/10/2021) (29)†</b>                                                                                                                                                                                                                       |                                                                                                                                                                                          |                                                                                                                                                                                                                                                                                                                                                |
| prison* OR inmate* OR imprison* OR correctional* OR jail* OR "criminal justice" OR detain* OR sentenced OR remand OR incarcerate* (2919)                                                                                                                  | comorbid* OR prevalence OR incidence OR epidemiolog* (14703)                                                                                                                             | psychiatr* OR psycho* OR depress* OR schizophren* OR alcohol* OR substance OR addict* OR "dual disorder" OR "dual disorders" (71192)                                                                                                                                                                                                           |
| <b>ProQuest Dissertations &amp; Theses Global* (25/09/2021) (800)*</b>                                                                                                                                                                                    |                                                                                                                                                                                          |                                                                                                                                                                                                                                                                                                                                                |

|                                                                                                                                                    |                                                                                |                                                                                                                                                                                            |
|----------------------------------------------------------------------------------------------------------------------------------------------------|--------------------------------------------------------------------------------|--------------------------------------------------------------------------------------------------------------------------------------------------------------------------------------------|
| ab,ti,su(prison* or inmate* or imprison* or correctional* or jail* or "criminal justice" or detain* or sentenced or remand or incarcerate*) 24,050 | Exact("epidemiology") OR ab,ti,su(comorbid* OR prevalence OR incidence) 99,901 | Exact("mental disorders") OR "drug use disorder" OR psychiatr* or psycho* or depress* or schizophren* or alcohol* or substance or addict* or "dual disorder" or "dual disorders" 1,953,032 |
|----------------------------------------------------------------------------------------------------------------------------------------------------|--------------------------------------------------------------------------------|--------------------------------------------------------------------------------------------------------------------------------------------------------------------------------------------|

\*Number after discharging duplicates.

†Hits were not exported in reference manager.

**Supplementary Material 2: Critical Appraisal Tool**

Reviewer: \_\_\_\_\_

Date: \_\_\_\_\_

Author: \_\_\_\_\_

Year: \_\_\_\_\_ Record No. \_\_\_\_\_

| No.                      | Item                                                                                                                                                                                                                                                                                                              | Rating |
|--------------------------|-------------------------------------------------------------------------------------------------------------------------------------------------------------------------------------------------------------------------------------------------------------------------------------------------------------------|--------|
| <b>External Validity</b> |                                                                                                                                                                                                                                                                                                                   |        |
| 1.                       | Was the study's target population a close representation of the national/regional population? †<br><u>1 point:</u> Samples from multiple institutions, or sample is representative for a province or for the whole country.<br><u>0 point:</u> Otherwise.                                                         |        |
| 2.                       | Were study participants recruited in an appropriate way*<br><u>1 point:</u> Stratified random, random, population or systematic sampling.<br><u>0 point:</u> Convenience sampling.                                                                                                                                |        |
| 3.                       | Was the sample size adequate*<br><u>1 point:</u> Sample size equal to or greater than 200 participants or a pre-calculated sample size reached.<br><u>0 point:</u> Otherwise.                                                                                                                                     |        |
| 4.                       | Was the data analysis conducted with sufficient coverage of the identified sample*<br><u>1 point:</u> Participation rate was equal or higher than 75% or non-response analysis indicated that the sample was representative for the target population.<br><u>0 point:</u> Otherwise.                              |        |
| <b>Internal Validity</b> |                                                                                                                                                                                                                                                                                                                   |        |
| 5.                       | Were the study subjects and the setting described in detail*<br><u>1 point:</u> Reporting of the descriptive statistics to describe the sample included gender AND at least three other socio-demographic or criminal characteristic.<br><u>0 point:</u> Otherwise.                                               |        |
| 6.                       | Was the same standardized interview used for data collection by all subjects? †<br><u>1 point:</u> Yes.<br><u>0 point:</u> Other mode of data collection were applied.                                                                                                                                            |        |
| 7.                       | Were objective, standard criteria used for the measurement of the condition*<br><u>1 point:</u> Disorders were assessed according to the criteria of DSM or ICD.<br><u>0 point:</u> Conditions were measured with standardized screening scale, which did not fulfil disorder criteria.                           |        |
| 8.                       | Was the condition measured reliably*<br><u>1 point:</u> Psychiatrist(s)/psychologist(s) made the diagnoses.<br><u>0 point:</u> Trained interviewer(s) made the diagnoses.                                                                                                                                         |        |
| 9.                       | Was there appropriate statistical reporting*<br><u>1 point:</u> Confidence intervals for prevalence rates or exact case numbers were reported.<br><u>0 point:</u> Only prevalence estimates were reported.                                                                                                        |        |
| 10.                      | Were subpopulations identified using objective criteria*<br><u>1 point:</u> The study explored only female/only male prisoners OR the results were reported separately for male/female prisoners.<br><u>0 point:</u> The study explored both male and female prisoners, but results were not reported separately. |        |
| <b>Score:</b>            |                                                                                                                                                                                                                                                                                                                   |        |

\* taken or adapted from JBI Critical Appraisal Checklist for Studies Reporting Prevalence.<sup>1</sup>

† taken or adapted from the Risk of Bias Tool.<sup>2</sup>

**Supplementary Table 2: Characteristics of included samples**

| Study                                           | Country     | Sex    | Sample size | Type of recruitment | Sampling method     | Diagnostic instrument | Diagnostic criteria | Time coverage    | QA |
|-------------------------------------------------|-------------|--------|-------------|---------------------|---------------------|-----------------------|---------------------|------------------|----|
| Abram et al (2003) <sup>3</sup>                 | US          | Female | 1269        | A                   | Stratified random   | DIS-III-R             | DSM-III-R           | Current          | 6  |
| Abram et al (1991) <sup>4</sup>                 | US          | Male   | 728         | A                   | Stratified random   | NIMH-DIS              | DSM-III-R           | Lifetime/current | 8  |
| Alevizopoulos and Igoumenou (2016) <sup>5</sup> | Greece      | Male   | 495         | C                   | Systematic          | ISPI                  | Not stated          | Current          | 8  |
| Andreoli et al (2014) <sup>6†</sup>             | Brazil      | Male   | 1192        | C                   | Stratified random   | CIDI                  | ICD-10              | Lifetime/current | 7  |
| Andreoli et al (2014) <sup>6†</sup>             | Brazil      | Female | 617         | C                   | Stratified random   | CIDI                  | ICD-10              | Lifetime/current | 8  |
| Assadi et al (2006) <sup>7</sup>                | Iran        | Male   | 351         | C                   | Stratified random   | SCID-CV               | DSM-IV              | Lifetime         | 9  |
| Ayrolimeethal et al (2014) <sup>8*</sup>        | India       | Mixed  | 255         | A                   | Population          | MINI-Plus             | Not stated          | Current          | 7  |
| Beaudette and Stewart (2016) <sup>9*</sup>      | Canada      | Male   | 1110        | A                   | Population          | SCID-I                | DSM-IV              | Lifetime/current | 9  |
| Bebbington et al (2017) <sup>10*</sup>          | UK          | Male   | 197         | C                   | Sequential random   | CIS-R, SCAN, SADQ     | ICD-10              | Current          | 8  |
| Bebbington et al (2017) <sup>10*</sup>          | UK          | Female | 171         | C                   | Sequential random   | CIS-R, SCAN, SADQ     | ICD-10              | Current          | 8  |
| Benavides et al (2019) <sup>11*</sup>           | Ecuador     | Male   | 309         | C                   | Random              | MINI                  | DSM-IV              | Current          | 9  |
| Blanchette and Motiuk, (1996) <sup>12†</sup>    | Canada      | Female | 76          | C                   | Population          | DIS                   | DSM-III             | Lifetime         | 6  |
| Brink et al (2001) <sup>13</sup>                | Canada      | Male   | 202         | A                   | Random              | SCID-I                | DSM-IV              | Lifetime         | 9  |
| Brown et al (2018) <sup>14*</sup>               | Canada      | Female | 86          | A                   | Population          | SCID-I/NP             | DSM-IV-TR           | Lifetime/current | 7  |
| Brown et al (2018) <sup>15*</sup>               | Canada      | Female | 154         | C                   | Systematic sampling | SCID-I/NP             | DSM-IV-TR           | Lifetime         | 7  |
| Butler et al (2011) <sup>16</sup>               | Australia   | Male   | 1208        | A, C                | Random              | CIDI-A                | ICD-10              | Current          | 7  |
| Butler et al (2011) <sup>16</sup>               | Australia   | Female | 270         | A, C                | Random              | CIDI-A                | ICD-10              | Current          | 7  |
| Chiles et al (1990) <sup>17</sup>               | US          | Male   | 109         | A                   | Not stated          | DIS                   | DSM-III-R           | Lifetime         | 4  |
| Cote and Hodgins (1990) <sup>18</sup>           | Canada      | Male   | 495         | C                   | Random              | DIS-III-A             | DSM-III             | Lifetime         | 8  |
| Curtin et al (2009) <sup>19†</sup>              | Ireland     | Male   | 615         | A                   | Population          | SADS-L                | ICD-10              | Lifetime         | 10 |
| Daniel et al (1988) <sup>20</sup>               | US          | Female | 100         | A                   | Population          | DIS-III               | DSM-III             | Lifetime         | 8  |
| Denton (1995) <sup>21</sup>                     | Australia   | Female | 56          | C                   | Population          | SCID-R                | DSM-III-R           | Lifetime/current | 7  |
| Dudeck et al (2009) <sup>22*</sup>              | Germany     | Male   | 102         | C                   | Population          | SCID-I                | DSM-IV              | Lifetime/current | 7  |
| Duffy et al (2006) <sup>23</sup>                | Ireland     | Male   | 438         | C                   | Stratified random   | SADS-L, SODQ          | ICD-10              | Lifetime         | 9  |
| Forry et al (2019) <sup>24*</sup>               | Uganda      | Male   | 414         | C                   | Simple random       | MINI                  | ICD-10              | Current          | 8  |
| Fovet et al (2020) <sup>25*</sup>               | France      | Male   | 630         | A                   | Simple random       | MINI                  | ICD-10              | Current          | 8  |
| Fovet et al (2020) <sup>25*</sup>               | France      | Female | 23          | A                   | Simple random       | MINI                  | ICD-10              | Current          | 7  |
| Gunter et al (2008) <sup>26*</sup>              | US          | Male   | 264         | A                   | Simple random       | MINI-Plus             | DSM-IV              | Current          | 7  |
| Gunter et al (2008) <sup>26*</sup>              | US          | Female | 56          | A                   | Simple random       | MINI-Plus             | DSM-IV              | Current          | 6  |
| Herrman et al (1991) <sup>27</sup>              | Australia   | Male   | 158         | C                   | Stratified random   | SCID                  | DSM-III-R           | Lifetime         | 7  |
| Herrman et al (1991) <sup>27</sup>              | Australia   | Female | 31          | C                   | Stratified random   | SCID                  | DSM-III-R           | Lifetime         | 7  |
| Indig et al (2016) <sup>28*</sup>               | New Zealand | Male   | 1096        | A                   | Population          | CIDI                  | DSM-IV              | Lifetime/current | 9  |
| Indig et al (2016) <sup>28*</sup>               | New Zealand | Female | 113         | A                   | Population          | CIDI                  | DSM-IV              | Lifetime/current | 7  |
| Joshi et al (2014) <sup>29</sup>                | India       | Female | 50          | C                   | Population          | Clinical judgement    | DSM-IV TR           | Current          | 5  |
| Linehan et al (2005) <sup>30</sup>              | Ireland     | Male   | 232         | C                   | Stratified random   | SADS-L, SODQ          | ICD-10              | Lifetime         | 9  |



|                                                                                 |               |        |      |      |                                  |               |                   |                  |     |
|---------------------------------------------------------------------------------|---------------|--------|------|------|----------------------------------|---------------|-------------------|------------------|-----|
| Lopez et al (2016) <sup>31</sup>                                                | Spain         | Male   | 472  | C    | Random                           | SCID-I        | DSM-IV            | Lifetime/current | 10  |
| Lukasiewicz et al (2009) <sup>32</sup> & Lukasiewicz et al (2007) <sup>33</sup> | France        | Male   | 998  | C    | Stratified random                | MINI-Plus     | DSM-IV            | Current          | 8/7 |
| Lynch et al (2014) <sup>34*</sup>                                               | US            | Female | 491  | C    | Random                           | CIDI, SCID-I  | DSM-IV            | Lifetime/current | 8   |
| Mir et al (2015) <sup>35</sup>                                                  | Germany       | Female | 150  | A    | Population                       | MINI          | DSM-IV            | Current          | 8   |
| Mundt et al (2013) <sup>36*</sup>                                               | Chile         | Male   | 855  | C    | Stratified random                | CIDI          | DSM-IV            | Current          | 9   |
| Mundt et al (2013) <sup>36*</sup>                                               | Chile         | Female | 153  | C    | Stratified random                | CIDI          | DSM-IV            | Current          | 8   |
| Mundt and Baranyi (2020) <sup>37*</sup>                                         | Chile         | Male   | 229  | A    | Random                           | MINI          | DSM-IV            | Current          | 9   |
| Mundt and Baranyi (2020) <sup>37*</sup>                                         | Chile         | Female | 198  | A    | Population                       | MINI          | DSM-IV            | Current          | 8   |
| Nacher et al (2018) <sup>38</sup>                                               | French Guiana | Male   | 707  | A    | Population                       | MINI          | DSM-V             | Current          | 9   |
| Naidoo and Mkize (2012) <sup>39</sup>                                           | South Africa  | Male   | 193  | C    | Stratified random                | MINI          | ICD-10 and DSM-IV | Current          | 7   |
| Nanéma et al (2014) <sup>40*</sup>                                              | Burkina Faso  | Male   | 419  | C    | Systematic random                | MINI          | ICD-10            | Current          | 7   |
| Piselli et al (2015) <sup>41</sup>                                              | Italy         | Male   | 526  | C    | Population                       | SCID-I, ASI-X | DSM-IV            | Current          | 9   |
| Piselli et al (2009) <sup>42</sup>                                              | Italy         | Male   | 302  | A    | Population                       | SCID-I        | DSM-IV            | Current          | 8   |
| Proctor et al (2019) <sup>43</sup>                                              | US            | Male   | 200  | A    | Random                           | CAAPE-5       | DSM-V             | Current          | 6   |
| Schröder (2005) <sup>44</sup>                                                   | Germany       | Male   | 76   | C    | Random                           | SCID-I        | DSM-IV            | Current          | 6   |
| Simpson et al (1999) <sup>45</sup>                                              | New Zealand   | Mixed  | 1248 | C    | Population and stratified random | CIDI-A        | DSM-IV            | Lifetime         | 8   |
| Tye and Mullen (2006) <sup>46</sup>                                             | Australia     | Female | 103  | C    | Population                       | SMHWB         | ICD-10            | Current          | 9   |
| Vicens et al (2011) <sup>47†</sup>                                              | Spain         | Male   | 707  | C    | Stratified random                | SCID          | DSM-IV            | Lifetime         | 8   |
| Widmann (2006) <sup>48</sup>                                                    | Germany       | Female | 63   | C    | Population                       | SCID-I        | DSM-IV            | Lifetime         | 7   |
| Wright et al (2006) <sup>49</sup>                                               | Ireland       | Female | 94   | A    | Population                       | SADS-L, SODQ  | ICD-10            | Lifetime         | 8   |
| Wright et al (2006) <sup>49</sup>                                               | Ireland       | Female | 92   | C    | Population                       | SADS-L, SODQ  | ICD-10            | Lifetime         | 9   |
| Zabala-Baños et al (2016) <sup>50*</sup>                                        | Spain         | Male   | 184  | C    | Stratified random                | SCID-I        | DSM-IV            | Lifetime/current | 8   |
| Zamzam and Hatta (2000) <sup>51</sup>                                           | Malaysia      | Female | 80   | A, C | Population                       | CIDI          | Not stated        | Lifetime         | 7   |
| Zhong et al (2020) <sup>52</sup>                                                | China         | Female | 2703 | C    | Population                       | MINI          | DSM-IV            | Lifetime         | 9   |

ASI-X=Addiction Severity Index; AUDIT=Alcohol Use Disorders Identification Test; A=admission; CAAPE=Comprehensive Addictions and Psychological Evaluation; C=cross-sectional; CIDI=Composite International Diagnostic Interview; DIS=Diagnostic Interview Schedule; DSM=Diagnostic and Statistical Manual of Mental Disorders; ICD=International Classification of Diseases; ISPI=Iowa Structured Psychiatric Interview; MD=mental disorder; MINI=Mini-International Neuropsychiatric Interview; NIMH-DIS=National Institute of Mental Health Diagnostic Interview Schedule; SADQ=Severity of Alcohol Dependence Questionnaire; SADS=Schedule for Affective Disorders and Schizophrenia; SCAN=Schedules for Clinical Assessment in Neuropsychiatry; SCID=Structured Clinical Interview for DSM Disorders; SMHWB=Survey of Mental Health and Wellbeing; SODQ=Severity of Dependence Questionnaire; SUD=substance use disorder; UK=United Kingdom; US=United States.

\*Authors calculated prevalence of dual disorders.

†Authors provided additional information or clarification.

**Supplementary Table 3: Race/ethnicity, nationality and country of birth in the included studies**

| Study                                           | Country       | Race/ethnicity, national identity and country of birth                                                                                                    |
|-------------------------------------------------|---------------|-----------------------------------------------------------------------------------------------------------------------------------------------------------|
| Abram et al (2003) <sup>3</sup>                 | US            | Race/ethnicity: African American (N=513), Non-Hispanic White (N=425), Hispanic (N=314)                                                                    |
| Abram et al (1991) <sup>4</sup>                 | US            | Race/ethnicity: Black (80.8%), White (12%), Hispanic (6.5%), Asian and American Indian (0.7%)                                                             |
| Alevizopoulos and Igoumenou (2016) <sup>5</sup> | Greece        | NR                                                                                                                                                        |
| Andreoli et al (2014) <sup>6</sup>              | Brazil        | (Race/ethnicity: "predominance of white prisoners born in the state")                                                                                     |
| Assadi et al (2006) <sup>7</sup>                | Iran          | NR                                                                                                                                                        |
| Ayrolimeethal et al (2014) <sup>8</sup>         | India         | NR                                                                                                                                                        |
| Beaudette and Stewart (2016) <sup>9</sup>       | Canada        | Race/ethnicity: Aboriginal (20.7%), Black (8.9%), White (59.7%), Other (10.6%)                                                                            |
| Bebbington et al (2017) <sup>10</sup>           | UK            | (Race/ethnicity: "third of the prisoners in the current sample were black or black/white mixed")                                                          |
| Benavides et al (2019) <sup>11</sup>            | Ecuador       | Country of birth: Place of family residence outside of the country (2.9%)                                                                                 |
| Blanchette and Motiuk (1996) <sup>12</sup>      | Canada        | Race/ethnicity: Caucasian (74.0%), Aboriginal (13.7%), Black (4.1%), Others (8.2%)                                                                        |
| Brink et al (2001) <sup>13</sup>                | Canada        | Race/ethnicity: Caucasian (67.8%), Aboriginal (17.8%), Asian (4.5%), East Indian (3.5%), Black (3.5%), Other (3.0%)                                       |
| Brown et al (2018a) <sup>14</sup>               | Canada        | Race/ethnicity: Indigenous (24.4%), Black (9.3%), White (53.5%), Other (10.5%), Missing (2.3%)                                                            |
| Brown et al (2018b) <sup>15</sup>               | Canada        | Race/ethnicity: Aboriginal (32.8%), Black (4.0%), White (57.0%); Other (7.3%)                                                                             |
| Butler et al (2011) <sup>16</sup>               | Australia     | Race/ethnicity: Australian born (80%), Indigenous (19%)                                                                                                   |
| Chiles et al (1990) <sup>17</sup>               | US            | NR                                                                                                                                                        |
| Cote and Hodgins (1990) <sup>18</sup>           | Canada        | NR                                                                                                                                                        |
| Curtin et al (2009) <sup>19</sup>               | Ireland       | Race/ethnicity: minority ethnicity (i.e. non-Caucasian, non-EU or Traveller) (19.8%)                                                                      |
| Daniel et al (1988) <sup>20</sup>               | US            | Race/ethnicity: White (65%), Black (33%), Other (2%)                                                                                                      |
| Denton (1995) <sup>21</sup>                     | Australia     | Country of birth: Australian-born (85.7%), Overseas-born (14.3%)                                                                                          |
| Dudeck et al (2009) <sup>22</sup>               | Germany       | NR                                                                                                                                                        |
| Duffy et al (2006) <sup>23</sup>                | Ireland       | Race/ethnicity: White EU (88.2%), Black (0.35%), Chinese (0.3%), Asian (0.3%), Irish Traveller (10.7%), Other (0.3%)                                      |
| Forry et al (2019) <sup>24</sup>                | Uganda        | NR                                                                                                                                                        |
| Fovet et al (2020) <sup>25</sup>                | France        | Nationality: "majority of the sample was composed of French men"                                                                                          |
| Gunter et al (2008) <sup>26</sup>               | US            | Race/ethnicity: African American (17.2%), Caucasian (71.6%), Other (11.3%)                                                                                |
| Herrman et al (1991) <sup>27</sup>              | Australia     | NR                                                                                                                                                        |
| Indig et al (2016) <sup>28</sup>                | New Zealand   | Race/ethnicity: European (35.0%), Māori (51.5%), Pacific peoples (9.8%), Other/Not recorded (3.7%)<br>Country of birth: New Zealand (90.9%), Other (9.1%) |
| Joshi et al (2014) <sup>29</sup>                | India         | Nationality: Indian (84%), Foreign nationals (14%)                                                                                                        |
| Linehan et al (2005) <sup>30</sup>              | Ireland       | Race/ethnicity: Caucasian (83.1%), Non EU European Caucasian (2.9%), African (5.7%), Chinese (1.8%), Irish Traveller (4.2%), Other (2.3%)                 |
| López et al (2016) <sup>31</sup>                | Spain         | Country of birth: Spain (81.8%)                                                                                                                           |
| Lukasiewicz et al (2009) <sup>32</sup>          | France        | NR                                                                                                                                                        |
| Lukasiewicz et al (2007) <sup>33</sup>          | France        | NR                                                                                                                                                        |
| Lynch et al (2014) <sup>34</sup>                | US            | Race/ethnicity: White or Caucasian (38%), African American or Black (37%), Latina (15%), American Indian (4%), Other (6%)                                 |
| Mir et al (2015) <sup>35</sup>                  | Germany       | Country of birth: Non-migrant (83%)                                                                                                                       |
| Mundt et al (2013) <sup>36</sup>                | Chile         | NR                                                                                                                                                        |
| Mundt and Baranyi (2020) <sup>37</sup>          | Chile         | Country of birth: Chilean (95.1%), Non-Chilean migrant populations (4.9%)                                                                                 |
| Nacher et al (2018) <sup>38</sup>               | French Guiana | Country of birth: French Guiana (47.8%), other French territories (3%), Suriname (15.1%), Guyana (14.3%), Brazil (10.6%), Haiti (3.1%)                    |
| Naidoo and Mkize (2012) <sup>39</sup>           | South Africa  | Race/ethnicity: African (90.7%), Colored (3.1%), Indian (5.2%), White (0.5%), Other (0.5%)                                                                |
| Nanéma et al (2014) <sup>40</sup>               | Burkina Faso  | Nationality: Burkina Faso (93.8%); foreign nationals (6.2%)                                                                                               |
| Piselli et al (2015) <sup>41</sup>              | Italy         | Nationality: foreign nationals (33.8%)<br>Race/ethnicity: Italy (66.2%), Africa (12.5%), Eastern Europe (16.2%), Other (5.1%)                             |
| Piselli et al (2009) <sup>42</sup>              | Italy         | Race/ethnicity: Southern-European (37.0%), African (33.3%), Eastern-European (29.7%)                                                                      |
| Proctor et al (2019) <sup>43</sup>              | US            | Race/ethnicity: White (86.0%), American Indian (7.5%), Black (3.5%)                                                                                       |
| Schröder (2005) <sup>44</sup>                   | Germany       | Nationality: German (93.4%), Other Europeans (5.3%), Other Nationalities (1.3%)<br>Country of birth: German (72.4%), Migrant (27.6%)                      |
| Simpson et al (1999) <sup>45</sup>              | New Zealand   | Race/ethnicity: Maori (48.4%), Pacific peoples (8.3%), Pakeha (30.9%), Other (12.3%)                                                                      |
| Tye and Mullen (2006) <sup>46</sup>             | Australia     | Race/ethnicity: Aboriginal (9.7%)                                                                                                                         |

|                                         |          |                                                                                                                          |
|-----------------------------------------|----------|--------------------------------------------------------------------------------------------------------------------------|
| Vicens et al (2011) <sup>47</sup>       | Spain    | Country of birth: Spain (72.5%), Africa (9.9%), America (8.9%), Asia (1.7%), Europe (6.2%), Other (0.1%), Unknown (0.6%) |
| Widmann (2006) <sup>48</sup>            | Germany  | Nationality: German (84.1%), Other Europeans (4.8%), Other Nationalities (11.1%)                                         |
| Wright et al (2006) <sup>49</sup> A     | Ireland  | Nationality: Irish origin (82.3%)                                                                                        |
| Zabala-Baños et al (2016) <sup>50</sup> | Spain    | Country of birth: Spain (54.9%), Africa (7.6%), South America (26.6%), Asia (0.5%), Europe (10.3%)                       |
| Zamzam and Hatta (2000) <sup>51</sup>   | Malaysia | Race/ethnicity: Malay (76.3%), Indians (12.5%), Chinese (8.8%) Kadazans (2.5%)                                           |
| Zhong et al (2020) <sup>52</sup>        | China    | Race/ethnicity: Han (90.8%), Tujia ethnicity (3.6%), Miao ethnicity (2.5%), Others (3.1%)                                |

*Note:* Categories and groups are reported as indicated in the studies. NR=not reported, UK=United Kingdom; US=United States.

**Supplementary Table 4: Quality appraisal of included samples**

| Study                                           | 1 | 2  | 3 | 4  | 5 | 6 | 7 | 8  | 9 | 10 | SCORE |
|-------------------------------------------------|---|----|---|----|---|---|---|----|---|----|-------|
| Abram et al (2003) <sup>3</sup>                 | 0 | 1  | 1 | 1  | 0 | 1 | 1 | 0  | 0 | 1  | 6     |
| Abram et al (1991) <sup>4</sup>                 | 0 | 1  | 1 | 1  | 1 | 1 | 1 | 1  | 0 | 1  | 8     |
| Alevizopoulos and Igoumenou (2016) <sup>5</sup> | 0 | 1  | 1 | 1  | 1 | 1 | 1 | 0  | 1 | 1  | 8     |
| Andreoli et al (2014) <sup>6</sup> M            | 1 | 1  | 1 | 0  | 1 | 1 | 1 | 0  | 0 | 1  | 7     |
| Andreoli et al (2014) <sup>6</sup> F            | 1 | 1  | 1 | 1  | 1 | 1 | 1 | 0  | 0 | 1  | 8     |
| Assadi et al (2006) <sup>7</sup>                | 0 | 1  | 1 | 1  | 1 | 1 | 1 | 1  | 1 | 1  | 9     |
| Ayirolimeethal et al (2014) <sup>8</sup>        | 0 | 1  | 1 | 1  | 1 | 1 | 1 | 1  | 0 | 0  | 7     |
| Beaudette and Stewart (2016) <sup>9</sup>       | 1 | 1  | 1 | 1  | 1 | 1 | 1 | 0  | 1 | 1  | 9     |
| Bebbington et al (2017) <sup>10</sup> M         | 0 | 1  | 1 | 0  | 1 | 1 | 1 | 1  | 1 | 1  | 8     |
| Bebbington et al (2017) <sup>10</sup> F         | 0 | 1  | 1 | 0  | 1 | 1 | 1 | 1  | 1 | 1  | 8     |
| Benavides et al (2019) <sup>11</sup>            | 0 | 1  | 1 | 1  | 1 | 1 | 1 | 1  | 1 | 1  | 9     |
| Blanchette and Motiuk (1996) <sup>12</sup>      | 0 | 1  | 0 | 1  | 1 | 1 | 1 | NR | 0 | 1  | 6     |
| Brink et al (2001) <sup>13</sup>                | 0 | 1  | 1 | 1  | 1 | 1 | 1 | 1  | 1 | 1  | 9     |
| Brown et al (2018a) <sup>14</sup>               | 1 | 1  | 0 | 0  | 1 | 1 | 1 | 0  | 1 | 1  | 7     |
| Brown et al (2018b) <sup>15</sup>               | 1 | 1  | 0 | 0  | 1 | 1 | 1 | 0  | 1 | 1  | 7     |
| Butler et al (2011) <sup>16</sup> M             | 1 | 1  | 1 | NR | 1 | 1 | 1 | 0  | 0 | 1  | 7     |
| Butler et al (2011) <sup>16</sup> F             | 1 | 1  | 1 | NR | 1 | 1 | 1 | 0  | 0 | 1  | 7     |
| Chiles et al (1990) <sup>17</sup>               | 0 | NR | 0 | NR | 0 | 1 | 1 | NR | 1 | 1  | 4     |
| Cote and Hodgins (1990) <sup>18</sup>           | 1 | 1  | 1 | 1  | 0 | 1 | 1 | 0  | 1 | 1  | 8     |
| Curtin et al (2009) <sup>19</sup>               | 1 | 1  | 1 | 1  | 1 | 1 | 1 | 1  | 1 | 1  | 10    |
| Daniel et al (1988) <sup>20</sup>               | 0 | 1  | 0 | 1  | 1 | 1 | 1 | 1  | 1 | 1  | 8     |
| Denton (1995) <sup>21</sup>                     | 0 | 1  | 0 | 1  | 1 | 1 | 1 | 0  | 1 | 1  | 7     |
| Dudeck et al (2009) <sup>22</sup>               | 0 | 1  | 0 | 1  | 1 | 1 | 1 | 0  | 1 | 1  | 7     |
| Duffy et al (2006) <sup>23</sup>                | 1 | 1  | 1 | 1  | 1 | 1 | 1 | 0  | 1 | 1  | 9     |
| Forry et al (2019) <sup>24</sup>                | 1 | 1  | 1 | 1  | 1 | 1 | 1 | 0  | 1 | 0  | 8     |
| Fovet et al (2020) <sup>25</sup> M              | 1 | 1  | 1 | 0  | 1 | 1 | 1 | 1  | 1 | 0  | 8     |
| Fovet et al (2020) <sup>25</sup> F              | 1 | 1  | 0 | 0  | 1 | 1 | 1 | 1  | 1 | 0  | 7     |
| Gunter et al (2008) <sup>26</sup> M             | 0 | 1  | 1 | NR | 1 | 1 | 1 | 0  | 1 | 1  | 7     |
| Gunter et al (2008) <sup>26</sup> F             | 0 | 1  | 0 | NR | 1 | 1 | 1 | 0  | 1 | 1  | 6     |
| Herrman et al (1991) <sup>27</sup> M            | 0 | 1  | 0 | 0  | 1 | 1 | 1 | 1  | 1 | 1  | 7     |
| Herrman et al (1991) <sup>27</sup> F            | 0 | 1  | 0 | 0  | 1 | 1 | 1 | 1  | 1 | 1  | 7     |
| Indig et al (2016) <sup>28</sup> M              | 1 | 1  | 1 | 1  | 1 | 1 | 1 | 0  | 1 | 1  | 9     |
| Indig et al (2016) <sup>28</sup> F              | 1 | 1  | 0 | 0  | 1 | 1 | 1 | 0  | 1 | 1  | 7     |
| Joshi et al (2014) <sup>29</sup>                | 0 | 1  | 0 | NR | 1 | 0 | 1 | 1  | 0 | 1  | 5     |
| Linehan et al (2005) <sup>30</sup>              | 1 | 1  | 1 | 1  | 1 | 1 | 1 | 0  | 1 | 1  | 9     |
| López et al (2016) <sup>31</sup>                | 1 | 1  | 1 | 1  | 1 | 1 | 1 | 1  | 1 | 1  | 10    |
| Lukasiewicz et al (2009) <sup>32*</sup>         | 1 | 1  | 1 | 0  | 1 | 1 | 1 | 1  | 1 | 0  | 8     |
| Lukasiewicz et al (2007) <sup>33*</sup>         | 1 | 1  | 1 | 0  | 1 | 1 | 1 | 1  | 0 | 0  | 7     |
| Lynch et al (2014) <sup>34</sup>                | 0 | 1  | 1 | 1  | 1 | 1 | 1 | 0  | 1 | 1  | 8     |
| Mir et al (2015) <sup>35</sup>                  | 0 | 1  | 0 | 1  | 1 | 1 | 1 | 1  | 1 | 1  | 8     |
| Mundt et al (2013) <sup>36</sup> M              | 1 | 1  | 1 | 1  | 1 | 1 | 1 | 0  | 1 | 1  | 9     |
| Mundt et al (2013) <sup>36</sup> F              | 1 | 1  | 0 | 1  | 1 | 1 | 1 | 0  | 1 | 1  | 8     |
| Mundt and Baranyi (2020) <sup>37</sup> M        | 0 | 1  | 1 | 1  | 1 | 1 | 1 | 1  | 1 | 1  | 9     |
| Mundt and Baranyi (2020) <sup>37</sup> F        | 0 | 1  | 0 | 1  | 1 | 1 | 1 | 1  | 1 | 1  | 8     |
| Nacher et al (2018) <sup>38</sup>               | 1 | 1  | 1 | 1  | 1 | 1 | 1 | 1  | 1 | 0  | 9     |
| Naidoo and Mkize (2012) <sup>39</sup>           | 0 | 1  | 0 | 1  | 1 | 1 | 1 | 1  | 1 | 0  | 7     |
| Nanéma et al (2014) <sup>40</sup>               | 0 | 1  | 1 | 1  | 1 | 1 | 1 | 0  | 1 | 0  | 7     |
| Piselli et al (2015) <sup>41</sup>              | 0 | 1  | 1 | 1  | 1 | 1 | 1 | 1  | 1 | 1  | 9     |
| Piselli et al (2009) <sup>42</sup>              | 0 | 1  | 1 | 0  | 1 | 1 | 1 | 1  | 1 | 1  | 8     |
| Proctor et al (2019) <sup>43</sup>              | 0 | 1  | 1 | NR | 1 | 1 | 1 | 0  | 0 | 1  | 6     |
| Schröder (2005) <sup>44</sup>                   | 0 | 1  | 0 | 0  | 1 | 1 | 1 | 1  | 0 | 1  | 6     |
| Simpson et al (1999) <sup>45</sup>              | 1 | 1  | 1 | 1  | 1 | 1 | 1 | 0  | 1 | 0  | 8     |
| Tye and Mullen (2006) <sup>46</sup>             | 1 | 1  | 0 | 1  | 1 | 1 | 1 | 1  | 1 | 1  | 9     |
| Vicens et al (2011) <sup>47</sup>               | 0 | 1  | 1 | 1  | 1 | 1 | 1 | 1  | 0 | 1  | 8     |
| Widmann (2006) <sup>48</sup>                    | 0 | 1  | 0 | 0  | 1 | 1 | 1 | 1  | 1 | 1  | 7     |
| Wright et al (2006) <sup>49</sup> A             | 1 | 1  | 0 | 0  | 1 | 1 | 1 | 1  | 1 | 1  | 8     |
| Wright et al (2006) <sup>49</sup> C             | 1 | 1  | 0 | 1  | 1 | 1 | 1 | 1  | 1 | 1  | 9     |
| Zabala-Baños et al (2016) <sup>50</sup>         | 0 | 1  | 0 | 1  | 1 | 1 | 1 | 1  | 1 | 1  | 8     |
| Zamzam and Hatta (2000) <sup>51</sup>           | 0 | 1  | 0 | 1  | 1 | 1 | 1 | 1  | 0 | 1  | 7     |
| Zhong et al (2020) <sup>52</sup>                | 1 | 1  | 1 | 1  | 1 | 1 | 1 | 0  | 1 | 1  | 9     |

A=admission sample; C=cross-sectional sample; F=female; M=male; NR=not reported.

\*Studies report on the same sample.

**Table 5: Prevalence estimates and odds ratios of co-occurring mental and substance use disorders in prison populations**

|                            | Prevalence                              |           |        |                |          |           | Odds Ratio |        |                |      |
|----------------------------|-----------------------------------------|-----------|--------|----------------|----------|-----------|------------|--------|----------------|------|
|                            | Range                                   | Estimate  | 95% CI | I <sup>2</sup> | % of rMD | % of rSUD | Estimate   | 95% CI | I <sup>2</sup> |      |
| <b>Current prevalence</b>  |                                         |           |        |                |          |           |            |        |                |      |
| Non-affective psychosis    |                                         |           |        |                |          |           |            |        |                |      |
| &                          | Substance use disorders (n=11236; k=28) | 0.0-14.6  | 3.5    | 2.2-5.0        | 90.9     | 49.2      | 9.2        | 1.7    | 1.4-2.2        | 34.6 |
| &                          | Alcohol use disorders (n=11669; k=26)   | 0.0-8.7   | 1.8    | 1.1-2.7        | 82.4     | 28.3      | 10.7       | 2.0    | 1.5-2.6        | 49.6 |
| &                          | Drug use disorders (n=10839; k=24)      | 0.0-16.8  | 2.4    | 1.2-4.0        | 92.8     | 37.0      | 10.1       | 2.0    | 1.4-2.9        | 68.3 |
| Depression                 |                                         |           |        |                |          |           |            |        |                |      |
| &                          | Substance use disorders (n=11133; k=27) | 0.8-49.8  | 9.1    | 5.6-13.3       | 96.9     | 51.6      | 23.3       | 1.6    | 1.3-2.0        | 53.0 |
| &                          | Alcohol use disorders (n=13528; k=29)   | 0.2-30.4  | 5.1    | 3.1-7.7        | 95.6     | 26.2      | 27.4       | 1.8    | 1.5-2.3        | 49.5 |
| &                          | Drug use disorders (n=11991; k=26)      | 0.0-44.5  | 5.4    | 2.7-8.9        | 97.5     | 34.1      | 25.8       | 1.8    | 1.4-2.2        | 42.6 |
| Axis I disorders           |                                         |           |        |                |          |           |            |        |                |      |
| &                          | Substance use disorders (n=10998; k=24) | 1.1-57.6  | 20.7   | 13.8-28.5      | 98.4     | 51.4      | 47.9       | 2.0*   | 1.4-2.9        | 79.8 |
| &                          | Alcohol use disorders (n=8809; k=18)    | 1.3-34.8  | 11.1   | 6.6-16.5       | 97.0     | 30.3      | 49.1       | 2.3    | 1.8-3.1        | 62.1 |
| &                          | Drug use disorders (n=7640; k=17)       | 2.1-50.2  | 15.8   | 8.85-24.2      | 98.2     | 43.2      | 47.2       | 2.6    | 2.1-3.3        | 46.7 |
| <b>Lifetime prevalence</b> |                                         |           |        |                |          |           |            |        |                |      |
| Non-affective psychosis    |                                         |           |        |                |          |           |            |        |                |      |
| &                          | Substance use disorders (n=7241; k=21)  | 0.0-28.3  | 6.9    | 4.7-9.4        | 89.1     | 86.0      | 9.8        | 1.7    | 1.1-2.5        | 41.9 |
| &                          | Alcohol use disorders (n=7119; k=14)    | 0.0-19.0  | 4.9    | 2.4-8.0        | 96.5     | 60.5      | 11.0       | 2.0    | 1.6-2.6        | 0.0  |
| &                          | Drug use disorders (n=6956; k=12)       | 0.0-26.1  | 5.3    | 2.3-9.4        | 95.4     | 63.1      | 10.5       | 2.1    | 1.7-2.6        | 0.0  |
| Major depression           |                                         |           |        |                |          |           |            |        |                |      |
| &                          | Substance use disorders (n=6485; k=18)  | 6.9-42.9  | 22.2   | 16.9-28.0      | 94.7     | 60.0      | 20.7       | 1.4*   | 1.1-1.8        | 57.1 |
| &                          | Alcohol use disorders (n=8828; k=15)    | 2.0-36.8  | 12.4   | 7.9-17.8       | 97.0     | 32.4      | 25.4       | 1.7    | 1.2-2.4        | 77.3 |
| &                          | Drug use disorders (n=8845; k=15)       | 3.0-35.7  | 14.3   | 9.5-19.8       | 95.0     | 43.9      | 30.4       | 2.0    | 1.3-2.9        | 93.2 |
| Axis I disorders           |                                         |           |        |                |          |           |            |        |                |      |
| &                          | Substance use disorders (n=5002; k=11)  | 14.3-68.8 | 39.9   | 28.3-52.1      | 96.8     | 89.0      | 53.7       | 2.7*   | 1.8-4.0        | 72.9 |
| &                          | Alcohol use disorders (n=3884; k=8)     | 7.6-52.2  | 27.9   | 16.0-41.7      | 98.0     | 67.5      | 45.4       | 2.3    | 1.4-3.5        | 57.6 |
| &                          | Drug use disorders (n=3884; k=8)        | 5.1-64.9  | 29.7   | 14.3-47.9      | 98.6     | 68.2      | 52.4       | 2.7    | 2.0-3.6        | 52.2 |

rMD=reference mental disorder; rSUD=reference substance use disorder; n=pooled sample size; k=number of included samples.

\*Due to missing reference values, odds ratios could not be calculated for all included samples.

**Supplementary Table 6: Meta-regression exploring heterogeneity across estimates of comorbid non-affective psychosis and substance use disorders**

|                                            | <b>Substance use disorders</b> |           |          |               | <b>Alcohol use disorders</b> |           |          |               | <b>Drug use disorders</b> |           |          |               |
|--------------------------------------------|--------------------------------|-----------|----------|---------------|------------------------------|-----------|----------|---------------|---------------------------|-----------|----------|---------------|
|                                            | <b>b</b>                       | <b>SE</b> | <b>p</b> | <b>p-adj*</b> | <b>b</b>                     | <b>SE</b> | <b>p</b> | <b>p-adj*</b> | <b>b</b>                  | <b>SE</b> | <b>p</b> | <b>p-adj*</b> |
| <i>Current prevalence</i>                  |                                |           |          |               |                              |           |          |               |                           |           |          |               |
| <b>Univariate</b>                          | k=28                           |           |          |               | k=26                         |           |          |               | k=24                      |           |          |               |
| Sex (ref female)                           | -0.021                         | 0.039     | 0.588    | 0.840         | 0.027                        | 0.028     | 0.349    | 0.628         | 0.032                     | 0.045     | 0.486    | 0.912         |
| Sample size (ref n>200)                    | 0.002                          | 0.037     | 0.956    | 0.965         | -0.016                       | 0.028     | 0.571    | 0.919         | -0.027                    | 0.044     | 0.547    | 0.912         |
| Average age                                | -0.004                         | 0.005     | 0.462    | 0.770         | 0.000                        | 0.004     | 0.936    | 0.936         | -0.000                    | 0.007     | 0.992    | 0.992         |
| Year of data collection                    | -0.002                         | 0.003     | 0.429    | 0.770         | 0.001                        | 0.002     | 0.643    | 0.919         | 0.002                     | 0.002     | 0.361    | 0.912         |
| Non-response rate                          | 0.002                          | 0.001     | 0.159    | 0.770         | 0.002                        | 0.001     | 0.038    | 0.380         | 0.002                     | 0.002     | 0.293    | 0.912         |
| Type of recruitment (ref admission)        | -0.036                         | 0.037     | 0.341    | 0.770         | -0.033                       | 0.028     | 0.252    | 0.683         | -0.027                    | 0.042     | 0.529    | 0.912         |
| Country classification (ref HIC)           | -0.004                         | 0.043     | 0.930    | 0.965         | 0.010                        | 0.033     | 0.773    | 0.936         | 0.053                     | 0.046     | 0.262    | 0.912         |
| Diagnostic classification (ref DSM)        | 0.073                          | 0.042     | 0.094    | 0.770         | 0.046                        | 0.028     | 0.116    | 0.580         | -0.018                    | 0.059     | 0.765    | 0.937         |
| % of the sample with previous imprisonment | 0.000                          | 0.001     | 0.965    | 0.965         | -0.001                       | 0.001     | 0.273    | 0.683         | 0.000                     | 0.001     | 0.843    | 0.937         |
| Data source (ref unpublished)              | 0.031                          | 0.037     | 0.398    | 0.770         | -0.005                       | 0.030     | 0.883    | 0.936         | -0.012                    | 0.050     | 0.814    | 0.937         |
| <b>Multivariate</b>                        | NA                             |           |          |               |                              |           |          |               |                           |           |          |               |
| <i>Lifetime prevalence</i>                 |                                |           |          |               |                              |           |          |               |                           |           |          |               |
| <b>Univariate</b>                          | k=21                           |           |          |               | k=14                         |           |          |               | k=12                      |           |          |               |
| Sex (ref female)                           | -0.011                         | 0.048     | 0.822    | 0.822         | 0.025                        | 0.060     | 0.682    | 0.801         | 0.010                     | 0.076     | 0.903    | 0.988         |
| Sample size (ref n>200)                    | 0.014                          | 0.044     | 0.749    | 0.822         | 0.048                        | 0.060     | 0.440    | 0.801         | 0.072                     | 0.071     | 0.334    | 0.601         |
| Average age                                | 0.016                          | 0.008     | 0.068    | 0.680         | 0.002                        | 0.009     | 0.801    | 0.801         | 0.012                     | 0.011     | 0.313    | 0.601         |
| Year of data collection                    | 0.003                          | 0.003     | 0.229    | 0.822         | 0.001                        | 0.003     | 0.785    | 0.801         | 0.002                     | 0.003     | 0.509    | 0.764         |
| Non-response rate                          | -0.001                         | 0.002     | 0.682    | 0.822         | 0.001                        | 0.002     | 0.790    | 0.801         | 0.000                     | 0.003     | 0.921    | 0.988         |
| Type of recruitment (ref admission)        | -0.013                         | 0.045     | 0.768    | 0.822         | -0.034                       | 0.059     | 0.582    | 0.801         | 0.001                     | 0.074     | 0.988    | 0.988         |
| Country classification (ref HIC)           | -0.079                         | 0.096     | 0.425    | 0.822         | -0.185                       | 0.095     | 0.074    | 0.549         | -0.132                    | 0.122     | 0.304    | 0.601         |
| Diagnostic classification (ref DSM)        | -0.026                         | 0.051     | 0.616    | 0.822         | NA                           |           |          |               |                           |           |          |               |
| % of the sample with previous imprisonment | -0.001                         | 0.002     | 0.651    | 0.822         | 0.006                        | 0.002     | 0.122    | 0.549         | 0.005                     | 0.004     | 0.310    | 0.601         |
| Data source (ref unpublished)              | -0.038                         | 0.045     | 0.409    | 0.822         | -0.057                       | 0.058     | 0.345    | 0.801         | -0.080                    | 0.071     | 0.288    | 0.601         |
| <b>Multivariate</b>                        | NA                             |           |          |               |                              |           |          |               |                           |           |          |               |

Bold typeface denotes false discovery rate-corrected significance. b=unstandardized coefficient, DSM= Diagnostic and Statistical Manual of Mental Disorders, HIC=high-income countries, k=number of included samples, n=sample size, NA=not applicable, SE=standard error.

\* False discovery rate adjusted p-value.

**Supplementary Table 7: Meta-regression exploring heterogeneity across estimates of comorbid depression and substance use disorders**

|                                            | Substance use disorders |       |       |        | Alcohol use disorders |              |              |              | Drug use disorders |       |       |        |
|--------------------------------------------|-------------------------|-------|-------|--------|-----------------------|--------------|--------------|--------------|--------------------|-------|-------|--------|
|                                            | b                       | SE    | p     | p-adj* | b                     | SE           | p            | p-adj*       | b                  | SE    | p     | p-adj* |
| <i>Current prevalence</i>                  |                         |       |       |        |                       |              |              |              |                    |       |       |        |
| <b>Univariate</b>                          | k=27                    |       |       |        | k=29                  |              |              |              | k=26               |       |       |        |
| Sex (ref female)                           | -0.028                  | 0.068 | 0.683 | 0.946  | -0.026                | 0.052        | 0.623        | 0.759        | -0.007             | 0.068 | 0.919 | 0.919  |
| Sample size (ref n>200)                    | -0.005                  | 0.066 | 0.946 | 0.946  | 0.057                 | 0.051        | 0.273        | 0.546        | -0.016             | 0.069 | 0.823 | 0.919  |
| Average age                                | -0.010                  | 0.010 | 0.333 | 0.946  | -0.003                | 0.009        | 0.732        | 0.759        | -0.002             | 0.012 | 0.850 | 0.919  |
| Year of data collection                    | 0.004                   | 0.005 | 0.388 | 0.946  | 0.004                 | 0.004        | 0.266        | 0.546        | 0.006              | 0.005 | 0.208 | 0.520  |
| Non-response rate                          | 0.003                   | 0.002 | 0.164 | 0.820  | 0.006                 | 0.002        | 0.014        | 0.140        | 0.004              | 0.003 | 0.173 | 0.520  |
| Type of recruitment (ref admission)        | -0.172                  | 0.059 | 0.008 | 0.080  | -0.045                | 0.053        | 0.399        | 0.643        | -0.099             | 0.064 | 0.135 | 0.520  |
| Country classification (ref HIC)           | 0.013                   | 0.078 | 0.865 | 0.946  | -0.043                | 0.055        | 0.450        | 0.643        | 0.021              | 0.070 | 0.763 | 0.919  |
| Diagnostic classification (ref DSM)        | 0.044                   | 0.079 | 0.584 | 0.946  | 0.063                 | 0.052        | 0.236        | 0.546        | -0.114             | 0.075 | 0.145 | 0.520  |
| % of the sample with previous imprisonment | 0.001                   | 0.003 | 0.842 | 0.946  | 0.001                 | 0.002        | 0.759        | 0.759        | 0.003              | 0.003 | 0.330 | 0.660  |
| Data source (ref unpublished)              | 0.033                   | 0.067 | 0.625 | 0.946  | -0.063                | 0.052        | 0.238        | 0.546        | -0.063             | 0.074 | 0.402 | 0.670  |
| <b>Multivariate</b>                        | NA                      |       |       |        |                       |              |              |              |                    |       |       |        |
| <i>Lifetime prevalence</i>                 |                         |       |       |        |                       |              |              |              |                    |       |       |        |
| <b>Univariate</b>                          | k=18                    |       |       |        | k=15                  |              |              |              | k=15               |       |       |        |
| Sex (ref female)                           | -0.026                  | 0.071 | 0.716 | 0.895  | -0.061                | 0.070        | 0.396        | 0.792        | -0.088             | 0.067 | 0.209 | 0.418  |
| Sample size (ref n>200)                    | -0.008                  | 0.066 | 0.906 | 0.906  | 0.137                 | 0.060        | 0.041        | 0.190        | 0.125              | 0.061 | 0.063 | 0.315  |
| Average age                                | 0.020                   | 0.013 | 0.137 | 0.457  | 0.003                 | 0.011        | 0.831        | 0.940        | 0.015              | 0.010 | 0.167 | 0.418  |
| Year of data collection                    | 0.001                   | 0.004 | 0.843 | 0.906  | -0.0003               | 0.004        | 0.930        | 0.940        | 0.003              | 0.003 | 0.373 | 0.554  |
| Non-response rate                          | 0.003                   | 0.002 | 0.263 | 0.526  | <b>0.007</b>          | <b>0.002</b> | <b>0.004</b> | <b>0.040</b> | 0.006              | 0.002 | 0.022 | 0.220  |
| Type of recruitment (ref admission)        | 0.098                   | 0.060 | 0.122 | 0.456  | 0.006                 | 0.073        | 0.940        | 0.940        | 0.066              | 0.074 | 0.388 | 0.554  |
| Country classification (ref HIC)           | 0.206                   | 0.127 | 0.122 | 0.456  | -0.142                | 0.077        | 0.090        | 0.225        | -0.048             | 0.078 | 0.546 | 0.607  |
| Diagnostic classification (ref DSM)        | -0.160                  | 0.130 | 0.234 | 0.526  | -0.067                | 0.101        | 0.520        | 0.833        | 0.011              | 0.105 | 0.917 | 0.917  |
| % of the sample with previous imprisonment | -0.001                  | 0.003 | 0.644 | 0.895  | 0.007                 | 0.003        | 0.057        | 0.190        | 0.004              | 0.002 | 0.140 | 0.418  |
| Data source (ref unpublished)              | 0.050                   | 0.065 | 0.456 | 0.760  | -0.040                | 0.071        | 0.583        | 0.833        | -0.049             | 0.069 | 0.494 | 0.607  |
| <b>Multivariate</b>                        | NA                      |       |       |        |                       |              |              |              |                    |       |       |        |

Bold typeface denotes false discovery rate-corrected significance. b=unstandardized coefficient, DSM= Diagnostic and Statistical Manual of Mental Disorders, HIC=high-income countries, k=number of included samples, n=sample size, NA=not applicable, SE=standard error.

\* False discovery rate adjusted p-value.

**Supplementary Table 8: Meta-regression exploring heterogeneity across estimates of comorbid Axis I and substance use disorders**

|                                            | Substance use disorders |              |              |              | Alcohol use disorders |       |       |        | Drug use disorders |       |       |        |
|--------------------------------------------|-------------------------|--------------|--------------|--------------|-----------------------|-------|-------|--------|--------------------|-------|-------|--------|
|                                            | b                       | SE           | p            | p-adj*       | b                     | SE    | p     | p-adj* | b                  | SE    | p     | p-adj* |
| <i>Current prevalence</i>                  |                         |              |              |              |                       |       |       |        |                    |       |       |        |
| <b>Univariate</b>                          | k=24                    |              |              |              | k=18                  |       |       |        | k=17               |       |       |        |
| Sex (ref female)                           | -0.080                  | 0.088        | 0.376        | 0.583        | 0.004                 | 0.077 | 0.955 | 0.973  | -0.006             | 0.104 | 0.955 | 0.994  |
| Sample size (ref n>200)                    | 0.031                   | 0.093        | 0.742        | 0.742        | -0.003                | 0.079 | 0.973 | 0.973  | -0.015             | 0.104 | 0.887 | 0.994  |
| Average age                                | -0.012                  | 0.016        | 0.467        | 0.584        | 0.009                 | 0.017 | 0.623 | 0.853  | 0.010              | 0.026 | 0.724 | 0.994  |
| Year of data collection                    | 0.006                   | 0.006        | 0.346        | 0.584        | 0.008                 | 0.004 | 0.050 | 0.167  | 0.011              | 0.005 | 0.035 | 0.260  |
| Non-response rate                          | <b>0.009</b>            | <b>0.003</b> | <b>0.010</b> | <b>0.050</b> | 0.007                 | 0.003 | 0.025 | 0.125  | 0.006              | 0.004 | 0.153 | 0.382  |
| Type of recruitment (ref admission)        | <b>-0.266</b>           | <b>0.074</b> | <b>0.002</b> | <b>0.020</b> | -0.228                | 0.075 | 0.008 | 0.080  | -0.207             | 0.098 | 0.052 | 0.260  |
| Country classification (ref HIC)           | 0.106                   | 0.133        | 0.435        | 0.584        | 0.042                 | 0.101 | 0.682 | 0.853  | 0.148              | 0.114 | 0.213 | 0.426  |
| Diagnostic classification (ref DSM)        | 0.122                   | 0.096        | 0.221        | 0.584        | 0.075                 | 0.084 | 0.386 | 0.772  | -0.091             | 0.134 | 0.507 | 0.845  |
| % of the sample with previous imprisonment | -0.002                  | 0.004        | 0.673        | 0.742        | -0.002                | 0.004 | 0.627 | 0.853  | 0.000              | 0.004 | 0.994 | 0.994  |
| Data source (ref unpublished)              | -0.083                  | 0.091        | 0.368        | 0.584        | -0.102                | 0.087 | 0.257 | 0.640  | -0.226             | 0.145 | 0.138 | 0.383  |
| <b>Multivariate</b>                        |                         |              |              |              |                       |       |       |        |                    |       |       |        |
| Non-response rate                          | <b>0.007</b>            | <b>0.003</b> | <b>0.043</b> |              |                       |       |       |        |                    |       |       |        |
| Type of recruitment (ref admission)        | <b>-0.179</b>           | <b>0.075</b> | <b>0.029</b> |              |                       |       |       |        |                    |       |       |        |
| <i>Lifetime prevalence</i>                 |                         |              |              |              |                       |       |       |        |                    |       |       |        |
| <b>Univariate</b>                          | k=11                    |              |              |              | k=8                   |       |       |        | k=8                |       |       |        |
| Sex (ref female)                           | -0.095                  | 0.112        | 0.419        | 0.629        | NA                    |       |       |        | NA                 |       |       |        |
| Sample size (ref n>200)                    | 0.043                   | 0.115        | 0.716        | 0.806        |                       |       |       |        |                    |       |       |        |
| Average age                                | 0.036                   | 0.024        | 0.182        | 0.349        |                       |       |       |        |                    |       |       |        |
| Year of data collection                    | <b>0.019</b>            | <b>0.006</b> | <b>0.010</b> | <b>0.045</b> |                       |       |       |        |                    |       |       |        |
| Non-response rate                          | <b>0.011</b>            | <b>0.003</b> | <b>0.007</b> | <b>0.045</b> |                       |       |       |        |                    |       |       |        |
| Type of recruitment (ref admission)        | -0.010                  | 0.116        | 0.936        | 0.936        |                       |       |       |        |                    |       |       |        |
| Country classification (ref HIC)           | NA                      |              |              |              |                       |       |       |        |                    |       |       |        |
| Diagnostic classification (ref DSM)        | -0.271                  | 0.175        | 0.157        | 0.349        |                       |       |       |        |                    |       |       |        |
| % of the sample with previous imprisonment | -0.007                  | 0.011        | 0.578        | 0.743        |                       |       |       |        |                    |       |       |        |
| Data source (ref unpublished)              | -0.152                  | 0.108        | 0.194        | 0.349        |                       |       |       |        |                    |       |       |        |
| <b>Multivariate</b>                        |                         |              |              |              |                       |       |       |        |                    |       |       |        |
| NA                                         |                         |              |              |              |                       |       |       |        |                    |       |       |        |

Bold typeface denotes false discovery rate-corrected significance. b=unstandardized coefficient, DSM= Diagnostic and Statistical Manual of Mental Disorders, HIC=high-income countries, k=number of included samples, n=sample size, NA=not applicable, SE=standard error.

\* False discovery rate adjusted p-value.



**Supplementary Table 9: Prevalence estimates and odds ratios of comorbid mental and substance use disorders applying narrow disorder criteria for non-affective psychosis and major depression**

|                            |                                        | Prevalence |          |           |                |          |           | Odds Ratio |         |                |
|----------------------------|----------------------------------------|------------|----------|-----------|----------------|----------|-----------|------------|---------|----------------|
|                            |                                        | Range      | Estimate | 95% CI    | I <sup>2</sup> | % of rMD | % of rSUD | Estimate   | 95% CI  | I <sup>2</sup> |
| <i>Current prevalence</i>  |                                        |            |          |           |                |          |           |            |         |                |
| Non-affective psychosis    |                                        |            |          |           |                |          |           |            |         |                |
| &                          | Substance use disorders (n=9967; k=27) | 0-14.6     | 3.6      | 2.2-5.2   | 91.0           | 48.3     | 10.1      | 1.7        | 1.3-2.2 | 35.9           |
| &                          | Alcohol use disorders (n=10400; k=25)  | 0-8.7      | 1.9      | 1.1-2.7   | 82.9           | 27.3     | 11.0      | 1.8        | 1.4-2.4 | 42.7           |
| &                          | Drug use disorders (n=9570; k=23)      | 0-16.8     | 2.5      | 1.2-4.1   | 93.1           | 36.2     | 11.7      | 2.1        | 1.4-3.0 | 69.4           |
| Major depression           |                                        |            |          |           |                |          |           |            |         |                |
| &                          | Substance use disorders (n=7560; k=19) | 0.8-49.8   | 10.1     | 5.4-16.0  | 97.1           | 53.1     | 21.7      | 1.7        | 1.3-2.2 | 52.3           |
| &                          | Alcohol use disorders (n=8436; k=20)   | 0.2-30.4   | 4.9      | 2.6-7.7   | 94.0           | 29.2     | 22.2      | 1.7        | 1.2-2.3 | 56.4           |
| &                          | Drug use disorders (n= 8745; k=21)     | 0.7-44.5   | 6.6      | 3.3-10.9  | 97.0           | 40.1     | 23.4      | 1.8        | 1.4-2.2 | 38.6           |
| <i>Lifetime prevalence</i> |                                        |            |          |           |                |          |           |            |         |                |
| Non-affective psychosis    |                                        |            |          |           |                |          |           |            |         |                |
| &                          | Substance use disorders (n=5770; k=16) | 0-28.3     | 7.2      | 4.4-10.5  | 90.9           | 88.5     | 10.3      | 1.9        | 1.2-3.0 | 32.4           |
| &                          | Alcohol use disorders (n=7119; k=14)   | 0-19.0     | 4.9      | 2.4-8.0   | 96.5           | 60.5     | 11.0      | 2.0        | 1.6-2.6 | 0.0            |
| &                          | Drug use disorders (n=6956; k=12)      | 0-26.1     | 5.3      | 2.3-9.4   | 95.4           | 63.1     | 10.5      | 2.1        | 1.7-2.6 | 0.0            |
| Major depression           |                                        |            |          |           |                |          |           |            |         |                |
| &                          | Substance use disorders (n=4118; k=9)  | 6.9-38.3   | 19.0     | 12.2-26.9 | 90.1           | 84.3     | 23.8      | 1.6*       | 1.3-1.9 | 0.0            |
| &                          | Alcohol use disorders (n=3993; k=9)    | 4.1-25.3   | 12.7     | 7.3-22.3  | 93.8           | 68.3     | 22.7      | 1.7        | 1.1-2.5 | 44.4           |
| &                          | Drug use disorders (n=4073; k=10)      | 3.0-35.7   | 12.6     | 6.9-19.7  | 96.0           | 66.4     | 22.1      | 1.7        | 1.4-2.1 | 0.0            |

rMD=reference mental disorder; rSUD=reference substance use disorder; n=pooled sample size; k=number of included samples.

\*Due to missing reference values, odds ratios could not be calculated for all included samples.

**Supplementary Table 10: Egger's test indicating funnel plot asymmetry**

|                            | Egger's test |              |              | Egger's test after exclusion of influential sample(s) |            |         |
|----------------------------|--------------|--------------|--------------|-------------------------------------------------------|------------|---------|
|                            | bias         | SE of bias   | p-value      | bias                                                  | SE of bias | p-value |
| <b>Current prevalence</b>  |              |              |              |                                                       |            |         |
| Non-affective psychosis    |              |              |              |                                                       |            |         |
| & Substance use disorders  | 0.917        | 1.392        | 0.515        | NA                                                    |            |         |
| & Alcohol use disorders    | 0.549        | 1.115        | 0.627        | NA                                                    |            |         |
| & Drug use disorders       | 1.299        | 1.858        | 0.492        | NA                                                    |            |         |
| Depression                 |              |              |              |                                                       |            |         |
| & Substance use disorders  | 1.162        | 2.457        | 0.640        | NA                                                    |            |         |
| & Alcohol use disorders    | 3.256        | 1.978        | 0.111        | NA                                                    |            |         |
| & Drug use disorders       | 2.225        | 2.933        | 0.455        | NA                                                    |            |         |
| Axis I disorders           |              |              |              |                                                       |            |         |
| & Substance use disorders  | 2.875        | 3.742        | 0.451        | NA                                                    |            |         |
| & Alcohol use disorders    | 2.911        | 3.007        | 0.347        | NA                                                    |            |         |
| & Drug use disorders       | 4.514        | 3.974        | 0.274        | NA                                                    |            |         |
| <b>Lifetime prevalence</b> |              |              |              |                                                       |            |         |
| Non-affective psychosis    |              |              |              |                                                       |            |         |
| & Substance use disorders  | 0.056        | 1.408        | 0.969        | NA                                                    |            |         |
| & Alcohol use disorders    | 3.914        | 2.394        | 0.128        | NA                                                    |            |         |
| & Drug use disorders       | 3.662        | 2.325        | 0.146        | NA                                                    |            |         |
| Depression                 |              |              |              |                                                       |            |         |
| & Substance use disorders  | 1.510        | 2.084        | 0.479        | NA                                                    |            |         |
| & Alcohol use disorders    | <b>6.445</b> | <b>2.348</b> | <b>0.017</b> | 3.125                                                 | 2.007      | 0.145   |
| & Drug use disorders       | 3.807        | 2.040        | 0.085        | NA                                                    |            |         |
| Axis I disorders           |              |              |              |                                                       |            |         |
| & Substance use disorders  | 0.237        | 4.137        | 0.956        | NA                                                    |            |         |
| & Alcohol use disorders    | NA           |              |              |                                                       |            |         |
| & Drug use disorders       | NA           |              |              |                                                       |            |         |

SE=standard error.

**Supplementary Figure 1: Funnel plots for co-occurring substance use disorders and (1) non-affective psychosis, (2) depression and (3) Axis I disorders**

**(1)**

Current prevalence

Lifetime prevalence

(a) Substance use disorders

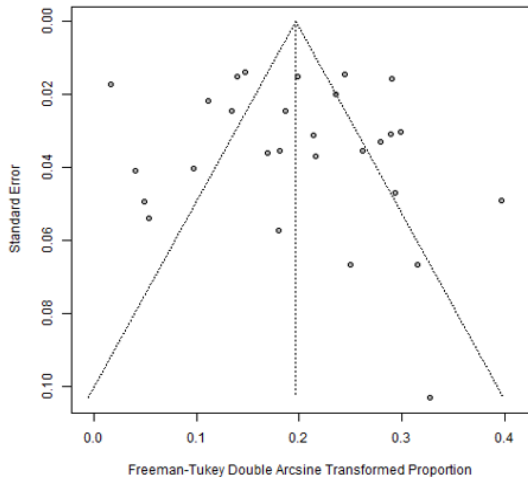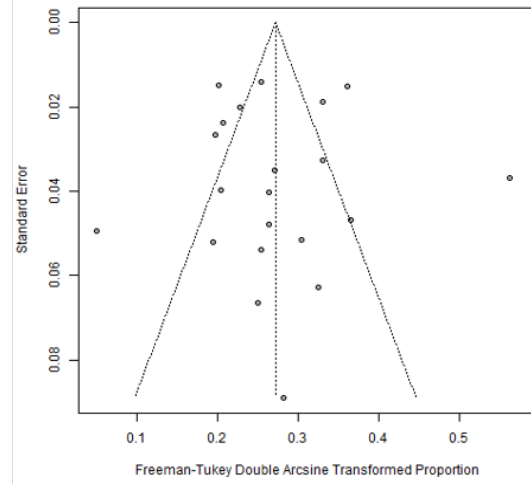

(b) Alcohol use disorders

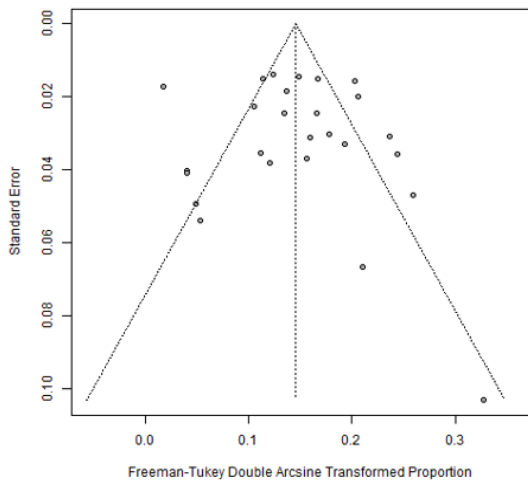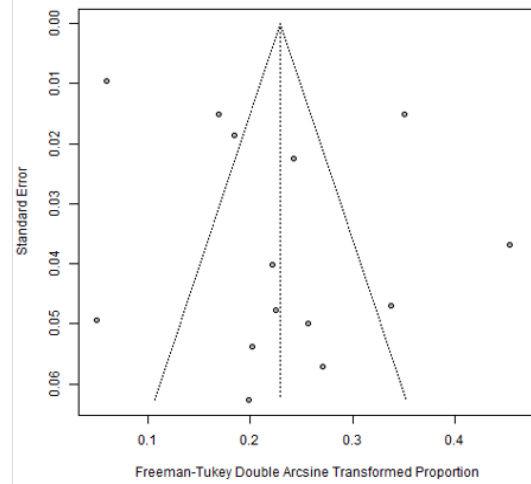

(c) Drug use disorders

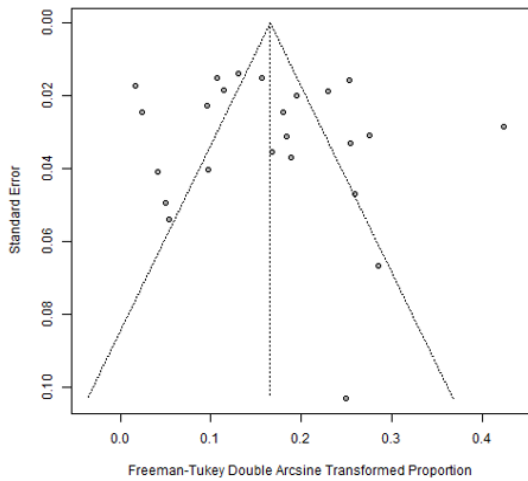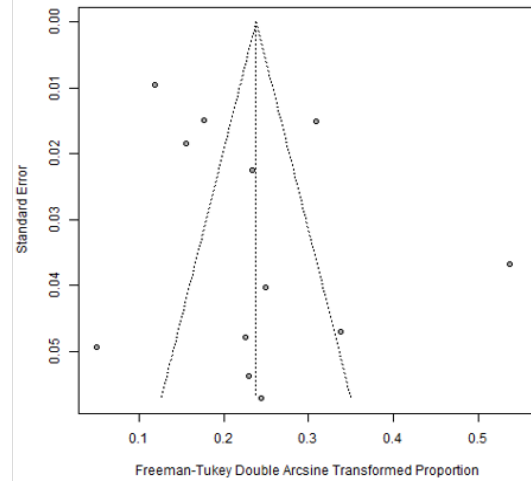

(2)

### Current prevalence

(a) Substance use disorders

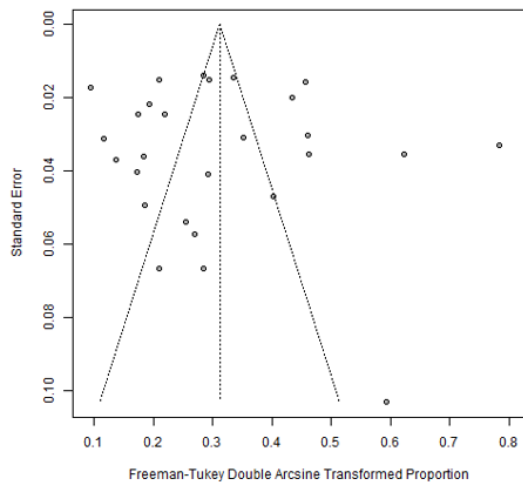

(b) Alcohol use disorders

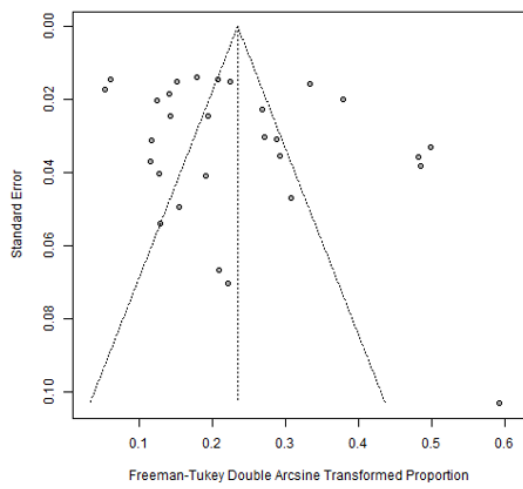

(c) Drug use disorders

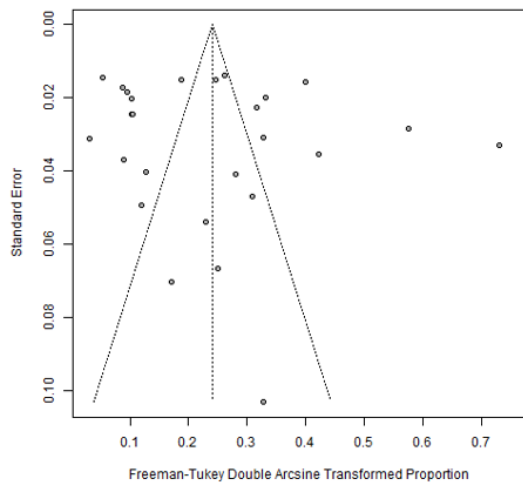

### Lifetime prevalence

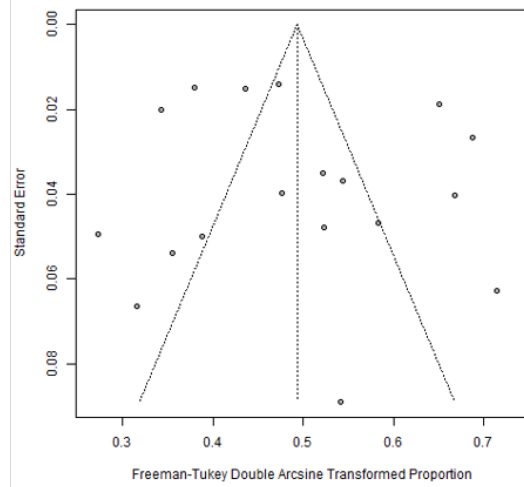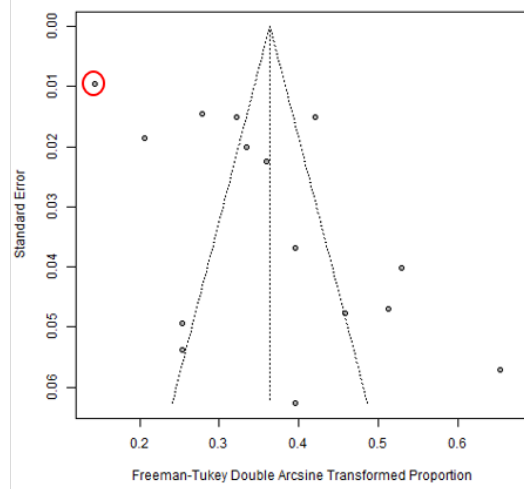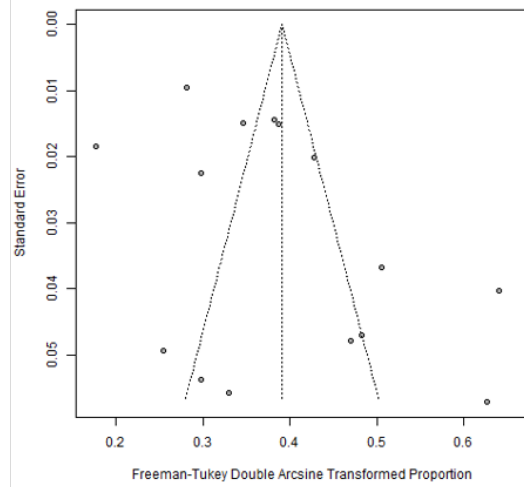

Red-circled estimate was excluded for sensitivity (see Supplementary Table 6).

(3)

Current prevalence

Lifetime prevalence

(a) Substance use disorders

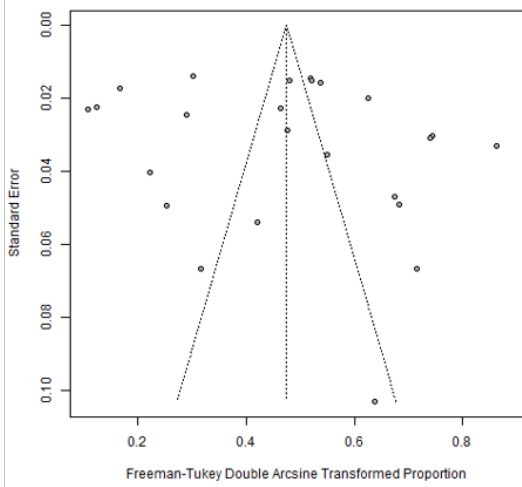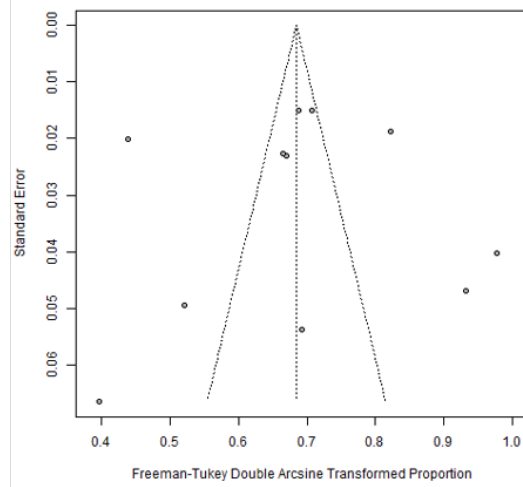

(b) Alcohol use disorders

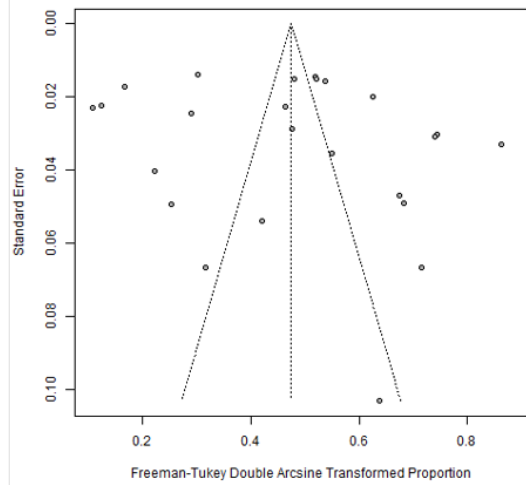

(c) Drug use disorders

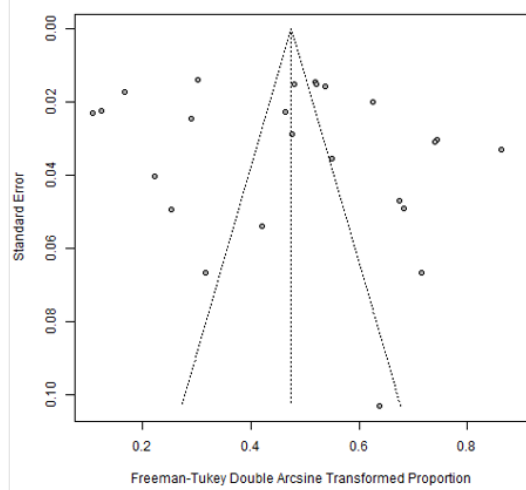

**Supplementary Table 11: Meta-regression with quality appraisal score**

|                            |                         | <b>Quality appraisal score</b> |           |          |
|----------------------------|-------------------------|--------------------------------|-----------|----------|
|                            |                         | <b>b</b>                       | <b>SE</b> | <b>p</b> |
| <b>Current prevalence</b>  |                         |                                |           |          |
| Non-affective psychosis    |                         |                                |           |          |
| &                          | Substance use disorders | -0.016                         | 0.018     | 0.372    |
| &                          | Alcohol use disorders   | -0.021                         | 0.015     | 0.186    |
| &                          | Drug use disorders      | -0.004                         | 0.023     | 0.853    |
| Depression                 |                         |                                |           |          |
| &                          | Substance use disorders | -0.009                         | 0.034     | 0.798    |
| &                          | Alcohol use disorders   | 0.011                          | 0.027     | 0.691    |
| &                          | Drug use disorders      | 0.041                          | 0.033     | 0.224    |
| Axis I disorders           |                         |                                |           |          |
| &                          | Substance use disorders | -0.034                         | 0.044     | 0.447    |
| &                          | Alcohol use disorders   | -0.005                         | 0.040     | 0.909    |
| &                          | Drug use disorders      | 0.014                          | 0.050     | 0.777    |
| <b>Lifetime prevalence</b> |                         |                                |           |          |
| Non-affective psychosis    |                         |                                |           |          |
| &                          | Substance use disorders | -0.001                         | 0.017     | 0.955    |
| &                          | Alcohol use disorders   | -0.002                         | 0.023     | 0.921    |
| &                          | Drug use disorders      | -0.0001                        | 0.027     | 0.998    |
| Depression                 |                         |                                |           |          |
| &                          | Substance use disorders | -0.012                         | 0.025     | 0.619    |
| &                          | Alcohol use disorders   | -0.049                         | 0.025     | 0.075    |
| &                          | Drug use disorders      | -0.041                         | 0.026     | 0.142    |
| Axis I disorders           |                         |                                |           |          |
| &                          | Substance use disorders | -0.042                         | 0.048     | 0.401    |
| &                          | Alcohol use disorders   | NA                             |           |          |
| &                          | Drug use disorders      | NA                             |           |          |

b=unstandardized coefficient, SE=standard error.

**Supplementary Table 12: Prevalence of comorbid mental and substance use disorders before and after exclusion of outlier estimates**

|                            |              |      | Prevalence       |        |       |                 |        |       |
|----------------------------|--------------|------|------------------|--------|-------|-----------------|--------|-------|
|                            |              |      | Before exclusion |        |       | After exclusion |        |       |
|                            |              |      | Estimate         | 95% CI | $I^2$ | Estimate        | 95% CI | $I^2$ |
| <b>Current prevalence</b>  |              |      |                  |        |       |                 |        |       |
| Non-affective psychosis    |              |      |                  |        |       |                 |        |       |
| & Substance use disorders  | 20 out of 28 | 3.5  | 2.2-5.0          | 90.9   | 4.0   | 2.9-5.2         | 77.3   |       |
| & Alcohol use disorders    | 23 out of 26 | 1.8  | 1.1-2.7          | 82.4   | 1.8   | 1.2-2.5         | 68.6   |       |
| & Drug use disorders       | 18 out of 24 | 2.4  | 1.2-4.0          | 92.8   | 2.3   | 1.4-3.4         | 77.6   |       |
| Depression                 |              |      |                  |        |       |                 |        |       |
| & Substance use disorders  | 14 out of 27 | 9.1  | 5.6-13.3         | 96.9   | 6.9   | 5.0-9.0         | 75.0   |       |
| & Alcohol use disorders    | 17 out of 29 | 5.1  | 3.1-7.7          | 95.6   | 4.0   | 2.9-5.4         | 70.9   |       |
| & Drug use disorders       | 14 out of 26 | 5.4  | 2.7-8.9          | 97.5   | 5.9   | 4.0-8.0         | 81.4   |       |
| Axis I disorders           |              |      |                  |        |       |                 |        |       |
| & Substance use disorders  | 10 out of 24 | 20.7 | 13.8-28.5        | 98.4   | 22.7  | 19.5-26.0       | 67.1   |       |
| & Alcohol use disorders    | 10 out of 18 | 11.1 | 6.6-16.5         | 97.0   | 10.5  | 6.8-14.9        | 84.5   |       |
| & Drug use disorders       | 7 out of 17  | 15.8 | 8.85-24.2        | 98.2   | 19.3  | 14.7-24.3       | 77.5   |       |
| <b>Lifetime prevalence</b> |              |      |                  |        |       |                 |        |       |
| Non-affective psychosis    |              |      |                  |        |       |                 |        |       |
| & Substance use disorders  | 18 out of 21 | 6.9  | 4.7-9.4          | 89.1   | 6.1   | 2.1-6.8         | 69.0   |       |
| & Alcohol use disorders    | 10 out of 14 | 4.9  | 2.4-8.0          | 96.5   | 4.5   | 3.1-6.1         | 55.6   |       |
| & Drug use disorders       | 9 out of 12  | 5.3  | 2.3-9.4          | 95.4   | 5.2   | 3.3-7.5         | 87.0   |       |
| Major depression           |              |      |                  |        |       |                 |        |       |
| & Substance use disorders  | 11 out of 18 | 22.2 | 16.9-28.0        | 94.7   | 20.4  | 16.3-24.8       | 68.2   |       |
| & Alcohol use disorders    | 11 out of 15 | 12.4 | 7.91-17.8        | 97.0   | 12.2  | 8.9-16.0        | 86.8   |       |
| & Drug use disorders       | 11 out of 15 | 14.3 | 9.54-19.8        | 95.0   | 13.6  | 10.1-17.6       | 81.6   |       |
| Axis I disorders           |              |      |                  |        |       |                 |        |       |
| & Substance use disorders  | 7 out of 11  | 39.9 | 28.3-52.1        | 96.8   | 40.1  | 32.5-48.0       | 89.8   |       |
| & Alcohol use disorders    | 6 out of 8   | 27.9 | 16.0-41.7        | 98.0   | 28.7  | 18.3-40.4       | 94.7   |       |
| & Drug use disorders       | 6 out of 8   | 29.7 | 14.3-47.9        | 98.6   | 29.6  | 17.3-43.7       | 94.8   |       |

## References

1. Munn Z, Moola S, Riitano D, Lisy K. The development of a critical appraisal tool for use in systematic reviews addressing questions of prevalence. *Int J Health Policy Manag* 2014; **3**: 123–8.
2. Hoy D, Brooks P, Woolf A, et al. Assessing risk of bias in prevalence studies: modification of an existing tool and evidence of interrater agreement. *J Clin Epidemiol* 2012; **65**: 934–9.
3. Abram KM, McClelland GM, Teplin LA. Comorbidity of severe psychiatric disorders and substance use disorders among women in jail. *Am J Psychiatry* 2003; **160**: 1007–10.
4. Abram KM, Teplin LA. Co-occurring disorders among mentally ill jail detainees: Implications for public policy. *Am Psychol* 1991; **46**: 1036–45.
5. Alevizopoulos G, Igoumenou A. Psychiatric disorders and criminal history in male prisoners in Greece. *Int J Law Psychiatry* 2016; **47**: 171–5.
6. Andreoli SB, Santos MMd, Quintana MI, et al. Prevalence of mental disorders among prisoners in the State of Sao Paulo, Brazil. *PLoS ONE* 2014; **9**: e88836.
7. Assadi SM, Maryam N, Mahdi P, et al. Psychiatric morbidity among sentenced prisoners: prevalence study in Iran. *Br J Psychiatry* 2006; **188**: 159–64.
8. Ayirolimeethal A, Ragesh G, Ramanujam JM, George B. Psychiatric morbidity among prisoners. *Indian J Psychiatry* 2014; **56**: 150–53.
9. Beaudette JN, Stewart LA. National Prevalence of Mental Disorders among Incoming Canadian Male Offenders. *Can J Psychiatry* 2016; **61**: 624–32.
10. Bebbington P, Jakobowitz S, McKenzie N, et al. Assessing needs for psychiatric treatment in prisoners: 1. Prevalence of disorder. *Soc Psychiatry Psychiatr Epidemiol* 2017; **52**: 221–9.
11. Benavides A, Chuchuca J, Klaic D, Waters W, Martin M, Romero-Sandoval N. Depression and psychosis related to the absence of visitors and consumption of drugs in male prisoners in Ecuador: A cross sectional study. *BMC Psychiatry* 2019; **19**: 248.
12. Blanchette K, Motiuk LL. Female offenders with and without major mental health problems: a comparative investigation. Ottawa, ON, Canada: Correctional Services Canada, 1996.
13. Brink JH, Doherty D, Boer A. Mental disorder in federal offenders: a Canadian prevalence study. *Int J Law Psychiatry* 2001; **24**: 339–56.
14. Brown G, Barker J, McMillan K, et al. Prevalence of Mental Disorder among Federally Sentenced Women Offenders: In-Custody and Intake Samples. Ottawa, ON, Canada: Correctional Service of Canada, 2018.



15. Brown GP, Barker J, McMillan K, Norman R, Derkzen D, Stewart LA. National Prevalence of Mental Disorders among Federally Sentenced Women Offenders: In Custody Sample. Ottawa, ON, Canada: Correctional Service of Canada, 2018.
16. Butler T, Indig D, Allnutt S, Mamoon H. Co-occurring mental illness and substance use disorder among Australian prisoners. *Drug Alcohol Rev* 2011; **30**: 188–94.
17. Chiles JA, von Cleve E, Jemelka RP, Trupin EW. Substance abuse and psychiatric disorders in prison inmates. *Hosp Community Psychiatry* 1990; **41**: 1132–4.
18. Cote G, Hodgins S. Co-occurring mental disorders among criminal offenders. *Bull Am Acad Psychiatry Law* 1990; **18**: 271–81.
19. Curtin K, Monks S, Wright B, Duffy D, Linehan S, Kennedy HG. Psychiatric morbidity in male remanded and sentenced committals to Irish prisons. *Ir J Psychol Med* 2009; **26**: 169–73.
20. Daniel AE, Robins AJ, Reid JC, DE W. Lifetime and six-month prevalence of psychiatric disorders among sentenced female offenders. *Bull Am Acad Psychiatry Law* 1988; **16**: 333–42.
21. Denton B. Psychiatric morbidity and substance dependence among women prisoners: An Australian study. *Psychiatry Psychol Law* 1995; **2**: 173–7.
22. Dudeck M, Kopp D, Kuwert P, et al. Prevalence of psychiatric disorders in prisoners with a short imprisonment: Results from a prison in north Germany. *Psychiatr Prax* 2009; **36**: 219–24.
23. Duffy D, Linehan S, Kennedy HG. Psychiatric morbidity in the male sentenced Irish prisons population. *Ir J Psychol Med* 2006; **23**: 54–62.
24. Forry JB, Ashaba S, Rukundo GZ. Prevalence and associated factors of mental disorders among prisoners in Mbarara municipality, southwestern Uganda: A cross-sectional study. *BMC Psychiatry* 2019; **19**: 178.
25. Fovet T, Plancke L, Amariei A, et al. Mental disorders on admission to jail: A study of prevalence and a comparison with a community sample in the north of France. *Eur Psychiatry* 2020; **63**: e43.
26. Gunter TD, Arndt S, Wenman G, et al. Frequency of mental and addictive disorders among 320 men and women entering the Iowa prison system: Use-of the MINI-Plus. *J Am Acad Psychiatry Law* 2008; **36**: 27–34.
27. Herrman H, McGorry P, Mills J, Singh B. Hidden severe psychiatric morbidity in sentenced prisoners: An Australian study. *Am J Psychiatry* 1991; **148**: 236–9.
28. Indig D, Gear C, Wilhelm K. Comorbid substance use disorders and mental health disorders among New Zealand prisoners. Wellington, New Zealand: New Zealand Department of Corrections, 2016.

29. Joshi P, Kukreja S, Desousa A, Shah N, Shrivastava A. Psychopathology and other contributing stressful factors in female offenders: An exploratory study. *Indian J Forensic Med Toxicol* 2014; **8**: 149–55.
30. Linehan SA, Duffy DM, Wright B, Curtin K, Monks S, Kennedy HG. Psychiatric morbidity in a cross-sectional sample of male remanded prisoners. *Ir J Psychol Med* 2005; **22**: 128–32.
31. López M, Saavedra FJ, López A, Laviana M. Prevalence of Mental Health problems in sentenced men in prisons from Andalucía (Spain). *Rev Esp Sanid Penit* 2016; **18**: 76–84.
32. Lukasiewicz M, Blecha L, Falissard B, et al. Dual diagnosis: prevalence, risk factors, and relationship with suicide risk in a nationwide sample of French prisoners. *Alcohol Clin Exp Res* 2009; **33**: 160–8.
33. Lukasiewicz M, Falissard B, Michel L, Neveu X, Reynaud M, Gasquet I. Prevalence and factors associated with alcohol and drug-related disorders in prison: a French national study. *Subst Abuse Treat Prev Policy* 2007; **2**: 1.
34. Lynch SM, Dehart DD, Belknap JE, et al. A multisite study of the prevalence of serious mental illness, PTSD, and substance use disorders of women in jail. *Psychiatr Serv* 2014; **65**: 670–4.
35. Mir J, Kastner S, Priebe S, Konrad N, Strohle A, Mundt AP. Treating substance abuse is not enough: comorbidities in consecutively admitted female prisoners. *Addict Behav* 2015; **46**: 25–30.
36. Mundt AP, Alvarado R, Fritsch R, et al. Prevalence Rates of Mental Disorders in Chilean Prisons. *PLoS ONE* 2013; **8**: e69109.
37. Mundt AP, Baranyi G. The Unhappy Mental Health Triad: Comorbid Severe Mental Illnesses, Personality Disorders, and Substance Use Disorders in Prison Populations. *Front Psychiatry* 2020; **11**: 804.
38. Nacher M, Ayhan G, Arnal R, et al. High prevalence rates for multiple psychiatric conditions among inmates at French Guiana's correctional facility: diagnostic and demographic factors associated with violent offending and previous incarceration. *BMC Psychiatry* 2018; **18**: 159.
39. Naidoo S, Mkize D. Prevalence of mental disorders in a prison population in Durban, South Africa. *Afr J Psychiatry* 2012; **15**: 30–5.
40. Nanéma D, Goumbri P, Karfo K, Ouango J, Ouédraogo A. Epidemiological and clinical aspects of mental disorders in prisons in Ouagadougou, Burkina Faso. *Annales Africaines de Psychiatrie* 2014; **3**: 59–75 (in French).
41. Piselli M, Attademo L, Garinella R, et al. Psychiatric needs of male prison inmates in Italy. *Int J Law Psychiatry* 2015; **41**: 82–8.
42. Piselli M, Elisei S, Murgia N, Quartesan R, Abram KM. Co-occurring psychiatric and substance use disorders among male detainees in Italy. *Int J Law Psychiatry* 2009; **32**: 101–7.

43. Proctor SL, Hoffmann NG, Raggio A. Prevalence of Substance Use Disorders and Psychiatric Conditions Among County Jail Inmates: Changes and Stability Over Time. *Crim Justice Behav* 2019; **46**: 24–41.
44. Schröder T. Psychische Erkrankungen bei männlichen Gefangenen im geschlossenen Vollzug. Lübeck, Germany: Universität zu Lübeck, 2005 (in German).
45. Simpson AIF, Brinded PMJ, Laidlaw TM, Fairley N, Malcolm F. The National Study of Psychiatric Morbidity in New Zealand Prisons - An Investigation of the Prevalence of Psychiatric Disorders among New Zealand Inmates. Wellington, New Zealand: Department of Corrections, 1999.
46. Tye CS, Mullen PE. Mental disorders in female prisoners. *Aust N Z J Psychiatry* 2006; **40**: 266–71.
47. Vicens E, Tort V, Duenas RM, et al. The prevalence of mental disorders in Spanish prisons. *Crim Behav Ment Health* 2011; **21**: 321–32.
48. Widmann B. Die Prävalenz psychischer Störungen bei Frauen in Haft. Aachen, Germany: Rheinisch-Westfälischen Technischen Hochschule Aachen, 2006 (in German).
49. Wright B, Duffy D, Curtin K, Linehan S, Monks S, Kennedy HG. Psychiatric morbidity among women prisoners newly committed and amongst remanded and sentenced women in the Irish prison system. *Ir J Psychol Med* 2006; **23**: 47–53.
50. Zabala-Baños MC, Segura A, Maestre-Miquel C, et al. Mental disorder prevalence and associated risk factors in three prisons of Spain. *Rev Esp Sanid Penit* 2016; **18**: 13–23.
51. Zamzam R, Hatta SM. Specific Psychiatric Disorders Among Convicted Female Offenders in a Malaysian Prison. *Malaysian J Psychiatry* 2000; **8**: 34–42.
52. Zhong SL, Zhu XM, Chen YN, et al. High Psychiatric Morbidity and Comorbidity Among Female Prisoners in Hunan, China. *Front Psychiatry* 2020; **11**: 271.
